# Supplementary material for: Genome-wide pathway analysis identifies VEGF pathway association with oral ulceration in systemic lupus erythematosus
Source: Springer Nature journal article supplement (doi:10.1186/s13075-017-1345-6), 2017-06-15
Supplement: MOESM1 [file 12445730]

# **SUPPLEMENTARY MATERIAL**

## **INDEX**

|                                                                                                                                        |            |
|----------------------------------------------------------------------------------------------------------------------------------------|------------|
| <b>1. Supplementary Material and Methods</b>                                                                                           | <b>2</b>   |
| 1.1 Study patients                                                                                                                     | 2          |
| 1.2 DNA extraction and genome-wide genotyping in the discovery and validation patients                                                 | 2          |
| 1.3 Imputation of genetic variants associated with SLE risk                                                                            | 4          |
| 1.4 Pathway-based association analysis                                                                                                 | 5          |
| 1.5 Differential expression analysis of VEGF pathway genes after topical immunotherapies                                               | 5          |
| <b>2. Supplementary Tables</b>                                                                                                         | <b>7</b>   |
| 2.1 Table S1. Association of SLE risk genes with SLE clinical phenotypes in the discovery cohort                                       | 7          |
| 2.2 Table S2. Genome-wide pathway associations obtained analyzing the 11 SLE clinical phenotypes in the discovery cohort               | 8          |
| 2.3 Table S3. Association results of the SNPs from the VEGF pathway associated with oral ulcers in SLE                                 | 105        |
| 2.4 Table S4. Statistical significance of the differential expression analysis performed on the VEGF pathway genes after immunotherapy | 106        |
| 2.5 Table S5. Statistical significance of the VEGF genetic pathway perturbation after topical immunotherapy                            | 107        |
| 2.6 Table S6. Established genetic variants for SLE risk                                                                                | 108        |
| 2.7 Table S7. Reference biological pathways selected for the present study                                                             | 109        |
| <b>3. Supplementary Figures</b>                                                                                                        | <b>117</b> |
| 3.1 Figure S1. Principal components of the SLE discovery cohort                                                                        | 117        |
| <b>4. References</b>                                                                                                                   | <b>118</b> |

# **1. Supplementary Material and Methods**

## **1.1 Study patients**

In the discovery stage, a total of 482 SLE patients were recruited. SLE patients were collected from the outpatient's clinics of the rheumatology departments of 15 Spanish University Hospitals belonging to the Immune-Mediated Inflammatory Disease (IMID) Consortium [1]. The IMID Consortium is a Spanish network of researchers working on the genetic basis of IMIDs. All SLE patients were diagnosed using the 1982 revised ACR diagnosis criteria [2]. All patients included in this study were >16 years old at the time of sample collection and had >3 years of evolution from the diagnosis date. SLE patients with psoriasis, inflammatory bowel disease (Crohn's disease or ulcerative colitis) or other rheumatic diseases like rheumatoid arthritis, or multiple sclerosis were excluded from the study. All SLE patients were Caucasian European with all four grandparents born in Spain.

In the validation stage, an independent cohort of 425 SLE patients was used to replicate the genetic pathways that were significantly associated with the SLE phenotypes in the discovery stage. All patients from the validation cohort fulfilled the ACR diagnostic criteria for SLE and were also collected from the IMID Consortium, following the same inclusion and exclusion criteria as for the discovery cohort.

## **1.2 DNA extraction and genome-wide genotyping in the discovery and validation patients**

Whole blood samples (5 mL) were collected from all SLE patients from the discovery and replication cohorts. Genomic DNA was then isolated using the Chemagic Magnetic Separation Module I (PerkinElmer, Waltham, MA).

In the discovery stage, the genome-wide genotyping of the 482 SLE patients was performed using the Illumina Quad610 Beadchips (Illumina, San Diego, California, USA) at the Centro Nacional de Genotipado (CeGen, Madrid, Spain). Genotype calling was performed using the GenomeStudio data analysis software v2011.1 (Illumina, San Diego, California, USA). The genotyping quality control analysis was performed using PLINK software [3]. From the 598,258 SNPs available in the Illumina genotyping array, a total of 582,539 autosomal SNPs were selected for the quality control analysis. The SNPs included in the association analysis had a minor allele frequency  $>0.05$  and  $<5\%$  of missing data (94.17% SNPs). Using an additional cohort of 1,558 healthy controls from the same population, we tested the deviation of the SNPs from the Hardy-Weinberg equilibrium [4]. Those SNPs that were not in Hardy-Weinberg equilibrium in this cohort (0.03% SNPs,  $P < 1e-4$ ) were subsequently removed. To evaluate the presence of potential population stratification in the SLE patient cohorts, we used the principal component analysis (PCA) implemented in EIGENSOFT (v4.2) software [5]. Using the first 10 PCs of variation over 10 iterations we identified 14 samples showing an outlier genetic background and were excluded from downstream analysis. After the quality control analysis, a final data set of 507,051 SNPs and 395 SLE patients was available for the GWPA.

The validation of the two genetic pathways associated in the discovery stage required the genotyping and analysis of a total 1,347 SNPs. Given the relatively large number of variants and the utility of genome-wide data for accurate ancestry outlier identification, the 425 SLE patients of the validation cohort were also genotyped using Illumina Quad610 microarray (Illumina, San Diego, California, USA) at the HudsonAlpha Institute for Biotechnology (Huntsville, Alabama, USA). For the pathway-based analysis, we excluded all non-autosomal SNPs, SNPs with a minor allele frequency

<0.05, >5% of missing data (85.01%) as well as those SNPs that were not in Hardy-Weinberg equilibrium (0.03% SNPs,  $P < 1e-4$ ) in a cohort of 1,558 controls from the same population [4]. All 1,347 SNPs from the two genetic pathways associated in the discovery stage passed the quality control. In order to estimate the principal components (PCs) of variation, we analyzed the genome-wide genetic variation using the EIGENSOFT (v4.2) software. Based on the first 10 PCs of variation over 10 iterations, we identified 4 samples showing an outlier genetic background that were subsequently discarded from the pathway-based analysis. A total of 394 SLE patients and all 1,347 SNPs from the two genetic pathways passed the quality control and were available for the pathway-based analysis of the validation stage.

### **1.3 Imputation of genetic variants associated with SLE risk**

From the established autosomal SLE risk SNPs (N=41 SNPs), the genetic variants that were not directly genotyped by the GWAS Quad610 genotyping array (N=17 SNPs) were imputed. SHAPEIT V2-644 (Oxford, UK) software was used to pre-phase the haplotypes of the SNPs that passed the genotyping quality control analysis [6], and these haplotypes were subsequently analyzed using IMPUTE V2 (Oxford, UK) software [7] to impute the missing SLE risk SNPs. The reference genotyping data used for imputation was obtained from the European cohort (N=379 samples) of the latest release of the 1000 Genomes Project (phase 1, version 3) [8]. In the imputation quality control analysis, we excluded those SNPs that had an IMPUTE2 info quality metric < 0.8 (N=1 SNP). After the imputation quality control, a total of 40 SLE risk SNPs were finally available for the association analysis with SLE phenotypes in the discovery cohort. In the validation cohort, the same procedure was followed to obtain the genotypes of the risk variants to be tested for replication.



## **1.4 Pathway-based association analysis**

The set- or pathway-based association analysis implemented in the PLINK software is composed by four steps. In the first step, the raw genotype data is used to compute the linkage disequilibrium ( $r^2$ ) between pathway SNPs in order to identify truly independent SNPs ( $r^2 < 0.2$ ). In the second step, the association between each SNP and SLE clinical phenotype is tested using the allelic  $\chi^2$  test. The independent SNPs that are nominally associated with the SLE phenotype are then selected for each genetic pathway. In the third step, the pathway statistic is computed as the average of the  $\chi^2$  statistics of the selected SNPs. In the last step, the statistical significance of the pathway association with the SLE phenotype is computed using a permutation-based approach. In the permutation procedure, the SLE phenotype is randomly assigned to the patient cohort and the  $\chi^2$  statistic is subsequently computed for each pathway. This analysis is then repeated multiple times ( $n=1,000,000$  permutations). Finally, the empirical P-value of each pathway is computed as the proportion of permuted  $\chi^2$  statistics that are higher than the observed  $\chi^2$  statistic.

## **1.5 Differential expression analysis of VEGF pathway genes after topical immunotherapies**

Cutaneous and mucocutaneous phenotypes in SLE are treated with a diverse group of immunotherapies. Given the observed genetic association between VEGF and oral ulcers, we hypothesized that the topical immunotherapies commonly prescribed for cutaneous SLE should induce significant transcriptional changes in the VEGF pathway genes. In order to test this hypothesis, we used transcriptional data from microarray experiments at the NCBI Gene Expression Omnibus microarray database (GEO, <http://www.ncbi.nlm.nih.gov/geo/>) [9]. In this database, we searched for whole genome expression profiling datasets from cutaneous/mucocutaneous human samples collected

from non-cancer individuals or cellular cultures (5th November 2015). From these, we looked for tissue or cell cultures treated with any of the common steroid and non-steroid topical immunotherapies most widely used in SLE. The former group was composed by 6 drugs (betamethasone valerate, clobetasol propionate, flucocinolone acetonide, fluocinonide, hydrocortisone butirate and triamcinolone acetonide) [10] and the latter group included a total of 12 drug (ABT-281, anthralin, calcipotriol, diphencyprone, imiquimod, intralesional interferon, pimecrolimus, sirolimus, squaric acid dibutyl ester, tacrolimus, topical interferon and topical zinc) [11]. Given that sample size is one of the major concerns to confidently identify differentially expressed genes between two experimental groups [12], small datasets were excluded from the search. We found a total of three gene expression datasets generated after treatment with four common immunotherapies for cutaneous SLE: betamethasone valerate and pimecrolimus (GSE32473), diphencyprone (GSE52360) and imiquimod (GSE68182). For each gene expression dataset, we performed quality control analysis and subsequent normalization on the log<sub>2</sub>-scale using the quantile normalization method (Figure S3) [13]. The differential expression analysis for the VEGF pathway genes between treated and non-treated samples was performed using Student's t-test. The statistical significance of the global perturbation of the VEGF pathway was assessed using the Binomial test. All analyses were performed using the R statistical software [14].

## 2. Supplementary Tables

### 2.1 Table S1. Association of SLE risk genes with SLE clinical phenotypes in the discovery cohort.

| SNP       | CHR | POS       | GENE          | MALAR RASH |                 | DISCOID RASH |                 | PHOTOSENSITIVITY |                 | ORAL ULCERS |                 | ARTHRITIS |                 | SEROISITIS |                 | RENAL DISORDER |                 | NEUROLOGIC DISORDER |                 | HEMATOLOGIC DISORDER |                  | IMMUNOLOGIC DISORDER |                 | ANTINUCLEAR ANTIBODIES |                    |
|-----------|-----|-----------|---------------|------------|-----------------|--------------|-----------------|------------------|-----------------|-------------|-----------------|-----------|-----------------|------------|-----------------|----------------|-----------------|---------------------|-----------------|----------------------|------------------|----------------------|-----------------|------------------------|--------------------|
|           |     |           |               | P          | OR (95% CI)     | P            | OR (95% CI)     | P                | OR (95% CI)     | P           | OR (95% CI)     | P         | OR (95% CI)     | P          | OR (95% CI)     | P              | OR (95% CI)     | P                   | OR (95% CI)     | P                    | OR (95% CI)      | P                    | OR (95% CI)     | P                      | OR (95% CI)        |
| rs2476601 | 1   | 11477368  | PPP2R2        | 5.28E-01   | 0.86(0.53-1.37) | 9.45E-01     | 0.97(0.48-1.97) | 5.41E-01         | 0.86(0.54-1.38) | 9.37E-01    | 1.02(0.61-1.64) | 2.44E-01  | 0.77(0.47-1.26) | 3.12E-01   | 0.77(0.47-1.26) | 6.47E-01       | 0.89(0.54-1.45) | 4.92E-01            | 0.73(0.32-1.69) | 3.92E-01             | NA(NA-NA)        | 9.41E-01             | 0.98(0.54-1.77) | 1.64E-02               | NA(NA-NA)          |
| rs1001274 | 1   | 16419745  | FCGR2A        | 7.99E-01   | 0.86(0.72-1.29) | 4.49E-01     | 1.10(0.75-1.85) | 1.69E-01         | 1.22(0.91-1.68) | 1.25E-01    | 1.25(0.91-1.69) | 2.86E-01  | 1.2(0.85-1.7)   | 9.09E-01   | 0.98(0.71-1.35) | 1.51E-01       | 0.83(0.59-1.09) | 1.57E-01            | 0.67(0.38-1.19) | 1.66E-01             | 1.58(0.81-3.11)  | 1.37E-01             | 0.76(0.52-1.11) | 3.62E-01               | 1.72(0.78-3.8)     |
| rs702610  | 1   | 173256195 | TNFSF4        | 1.95E-01   | 1.23(0.89-1.7)  | 1.03E-01     | 0.87(0.39-1.13) | 4.27E-01         | 1.13(0.82-1.57) | 3.04E-01    | 0.83(0.41-1.48) | 9.64E-01  | 1.01(0.69-1.48) | 6.15E-02   | 1.37(0.97-1.93) | 4.07E-02       | 1.41(0.1-1.96)  | 1.15E-01            | 0.59(0.28-1.23) | 8.56E-01             | 1.07(0.51-2.26)  | 2.14E-01             | 1.29(0.84-1.96) | 8.12E-01               | 0.77(0.34-1.75)    |
| rs2024505 | 1   | 206939984 | IL10          | 1.77E-01   | 0.77(0.52-1.14) | 6.47E-01     | 0.87(0.48-1.46) | 1.79E-01         | 0.85(0.57-1.25) | 1.70E-01    | 0.77(0.51-1.14) | 3.25E-02  | 1.68(1.01-2.81) | 1.71E-01   | 1.32(0.88-1.99) | 7.98E-01       | 0.95(0.63-1.43) | 3.45E-01            | 1.4(0.69-2.81)  | 8.95E-02             | 0.52(0.24-1.1)   | 1.31E-01             | 0.79(0.49-1.26) | 4.16E-01               | 0.68(0.27-1.73)    |
| rs978255  | 1   | 236039877 | LYST          | 9.19E-01   | 1.02(0.71-1.46) | 2.38E-01     | 1.4(0.78-2.52)  | 7.55E-01         | 1.06(0.74-1.51) | 8.56E-01    | 1.03(0.72-1.49) | 5.45E-01  | 1.14(0.78-1.72) | 8.87E-01   | 1.03(0.71-1.52) | 8.36E-01       | 0.96(0.66-1.4)  | 5.48E-01            | 1.25(0.59-2.62) | 7.82E-01             | 0.89(0.38-2.07)  | 9.48E-01             | 1.01(0.65-1.59) | 8.13E-01               | 1.12(0.44-2.83)    |
| rs740462  | 2   | 65662722  | SPRED2        | 1.67E-01   | 0.79(0.56-1.11) | 6.73E-01     | 1.11(0.66-1.88) | 4.46E-01         | 0.88(0.63-1.24) | 1.64E-01    | 0.79(0.56-1.11) | 3.08E-02  | 1.51(1.03-2.21) | 5.89E-01   | 0.91(0.63-1.3)  | 5.36E-01       | 1.12(0.78-1.6)  | 8.56E-01            | 1.06(0.54-2.08) | 1.18E-01             | 1.74(0.86-3.51)  | 8.42E-01             | 1.04(0.68-1.59) | 7.96E-01               | 1.12(0.46-2.7)     |
| rs211485  | 2   | 163110536 | ITIH1         | 2.68E-01   | 0.84(0.62-1.14) | 9.43E-01     | 1.02(0.64-1.61) | 5.67E-01         | 1.09(0.81-1.48) | 6.64E-01    | 0.94(0.69-1.27) | 6.35E-01  | 1.09(0.76-1.56) | 3.45E-01   | 0.86(0.62-1.19) | 4.89E-01       | 0.99(0.65-1.23) | 2.87E-01            | 0.73(0.41-1.31) | 5.51E-01             | 1.23(0.62-2.43)  | 5.30E-01             | 1.13(0.77-1.65) | 7.93E-01               | 0.9(0.39-2.04)     |
| rs1188941 | 2   | 191943742 | STAT4         | 5.20E-02   | 0.73(0.54-1.01) | 5.74E-01     | 1.14(0.72-1.82) | 3.48E-01         | 0.88(0.65-1.21) | 3.23E-01    | 0.83(0.62-1.17) | 7.71E-01  | 0.95(0.65-1.37) | 9.00E-01   | 0.98(0.7-1.38)  | 8.05E-01       | 0.99(0.69-1.34) | 4.04E-01            | 0.77(0.41-1.46) | 8.53E-02             | 1.98(0.86-4.59)  | 7.52E-01             | 1.07(0.71-1.59) | 7.31E-01               | 1.57(0.62-3.96)    |
| rs3708792 | 2   | 213871709 | ICZF2         | 2.76E-01   | 1.25(0.84-1.86) | 6.03E-01     | 1.18(0.63-2.2)  | 4.37E-02         | 1.51(1.02-2.25) | 5.44E-01    | 1.13(0.76-1.7)  | 3.66E-01  | 1.24(0.79-1.95) | 1.96E-01   | 0.76(0.51-1.1)  | 7.97E-01       | 1.06(0.69-1.61) | 3.78E-01            | 1.47(0.61-3.53) | 3.19E-02             | 2.38(1.14-4.99)  | 9.75E-01             | 1.01(0.61-1.66) | 1.71E-01               | 1.94(0.84-7.3)     |
| rs9311676 | 3   | 58470351  | ABHD5,PKX     | 5.99E-01   | 0.91(0.68-1.23) | 3.22E-01     | 1.26(0.81-1.96) | 5.60E-01         | 1.09(0.81-1.47) | 3.38E-02    | 0.72(0.53-0.97) | 5.30E-01  | 1.12(0.79-1.6)  | 4.40E-01   | 0.88(0.64-1.21) | 8.06E-01       | 1.04(0.76-1.42) | 1.10E-01            | 0.67(0.33-1.12) | 6.02E-01             | 1.21(0.61-2.4)   | 3.01E-01             | 0.82(0.56-1.18) | 1.09E-01               | 2.05(0.85-4.86)    |
| rs564799  | 3   | 159728687 | IL12A         | 9.22E-01   | 1.02(0.73-1.41) | 4.11E-02     | 1.63(1.03-2.58) | 3.81E-01         | 0.86(0.62-1.2)  | 3.30E-01    | 1.18(0.85-1.63) | 7.39E-01  | 0.94(0.64-1.37) | 9.52E-01   | 1.01(0.71-1.44) | 9.44E-01       | 0.99(0.71-1.39) | 1.30E-01            | 1.6(0.88-2.9)   | 9.22E-01             | 1.04(0.49-2.19)  | 2.13E-01             | 1.31(0.85-2.0)  | 1.09E-01               | 2.25(0.76-6.6)     |
| rs1028205 | 4   | 102737250 | BANK1         | 4.64E-01   | 0.89(0.65-1.21) | 6.43E-01     | 1.11(0.71-1.76) | 4.21E-01         | 0.88(0.65-1.2)  | 8.19E-01    | 1.04(0.76-1.42) | 7.98E-02  | 1.39(0.96-2.03) | 3.84E-01   | 1.16(0.83-1.61) | 7.12E-01       | 1.06(0.77-1.47) | 8.17E-01            | 1.07(0.59-1.95) | 9.83E-02             | 1.9(0.85-23)     | 7.38E-01             | 0.94(0.64-1.38) | 6.80E-01               | 1.19(0.51-2.78)    |
| rs7726414 | 5   | 133418184 | TCF7,SKPI     | 6.94E-01   | 1.12(0.66-1.91) | 5.46E-01     | 1.28(0.61-2.7)  | 7.33E-01         | 0.91(0.53-1.55) | 4.66E-01    | 1.23(0.72-2.1)  | 2.41E-01  | 1.53(0.76-3.08) | 1.79E-01   | 1.49(0.86-2.58) | 5.25E-01       | 1.4(0.81-2.41)  | 5.50E-01            | 0.7(0.21-2.31)  | 1.78E-01             | 3.26(0.44-24.26) | 8.78E-02             | 0.57(0.31-1.03) | 5.73E-01               | 0.68(0.22-33)      |
| rs1036748 | 5   | 15048146  | TNIP1         | 8.21E-01   | 0.96(0.69-1.33) | 3.97E-01     | 0.8(0.48-1.34)  | 3.94E-01         | 0.87(0.63-1.2)  | 6.60E-01    | 1.08(0.78-1.5)  | 8.72E-01  | 1.03(0.71-1.52) | 6.05E-01   | 1.1(0.77-1.56)  | 2.52E-01       | 0.89(0.63-1.26) | 3.08E-01            | 0.7(0.35-1.4)   | 2.99E-01             | 0.68(0.34-1.37)  | 6.05E-01             | 1.12(0.74-1.7)  | 8.83E-01               | 1.07(0.44-2.58)    |
| rs2431697 | 5   | 159879978 | MIR146A       | 5.74E-01   | 0.92(0.68-1.24) | 2.49E-01     | 0.76(0.48-1.22) | 6.96E-01         | 0.94(0.71-1.27) | 7.79E-01    | 0.96(0.71-1.3)  | 2.39E-01  | 1.24(0.86-1.78) | 9.23E-01   | 1.02(0.73-1.41) | 3.46E-01       | 1.16(0.85-1.6)  | 8.60E-01            | 1.05(0.59-1.9)  | 2.94E-01             | 0.7(0.36-1.36)   | 9.65E-02             | 0.73(0.5-1.06)  | 4.39E-01               | 0.73(0.33-1.61)    |
| rs1318860 | 6   | 34797241  | MHC class III | 6.72E-01   | 0.9(0.55-1.46)  | 1.75E-01     | 1.59(0.83-3.04) | 4.21E-01         | 1.22(0.75-1.99) | 5.35E-02    | 1.62(0.99-2.63) | 1.38E-02  | 2.3(1.12-4.72)  | 7.01E-01   | 0.9(0.53-1.54)  | 1.46E-01       | 0.67(0.39-1.16) | 9.62E-01            | 0.98(0.38-2.55) | 8.06E-02             | 4.14(0.56-30.71) | 1.56E-01             | 0.66(0.38-1.15) | 1.56E-01               | 1.38(0.32-5.95)    |
| rs9462027 | 6   | rs1979421 | UHRF1BP1      | 2.63E-02   | 0.7(0.51-0.95)  | 2.63E-01     | 1.31(0.83-2.06) | 8.90E-01         | 1.02(0.75-1.39) | 2.51E-02    | 0.69(0.5-0.95)  | 6.25E-01  | 0.91(0.63-1.31) | 2.45E-01   | 1.23(0.88-1.71) | 1.14E-01       | 0.76(0.54-1.06) | 6.09E-01            | 1.18(0.65-2.13) | 8.41E-01             | 0.93(0.46-1.87)  | 9.55E-01             | 1.01(0.69-1.49) | 6.79E-01               | 0.84(0.37-1.87)    |
| rs658431  | 6   | 106588806 | PRDM1,ATG5    | 7.35E-01   | 1.05(0.78-1.42) | 4.46E-01     | 1.2(0.76-1.9)   | 1.20E-01         | 1.27(0.94-1.71) | 6.53E-01    | 0.93(0.67-1.37) | 1.10E-01  | 1.07(0.76-1.5)  | 1.10E-01   | 1.09(0.79-1.5)  | 4.77E-01       | 0.81(0.45-1.45) | 6.39E-02            | 0.5(0.23-1.08)  | 5.21E-02             | 0.68(0.46-1.01)  | 9.33E-01             | 0.97(0.43-2.16) |                        |                    |
| rs6932056 | 6   | 138242437 | TNFAIP3       | 2.88E-01   | 1.48(0.7-3.13)  | 4.91E-01     | 0.66(0.18-2.39) | 4.82E-01         | 1.3(0.62-2.73)  | 4.85E-01    | 0.77(0.36-1.64) | 4.16E-01  | 1.45(0.56-3.8)  | 1.93E-02   | 2.37(1.14-4.95) | 6.58E-02       | 1.97(0.95-4.1)  | 5.86E-01            | 1.43(0.41-5.01) | 6.67E-01             | 0.72(0.17-3.13)  | 1.15E-01             | 2.37(0.69-8.12) | 1.29E-01               | 53.54(0.0-29660.0) |
| rs484942  | 7   | 28189391  | JAZF1         | 9.52E-01   | 0.99(0.74-1.33) | 9.88E-01     | 1.0(0.64-1.56)  | 6.19E-01         | 1.08(0.81-1.45) | 5.49E-01    | 1.09(0.81-1.47) | 9.09E-01  | 1.02(0.72-1.45) | 1.72E-01   | 1.26(0.91-1.75) | 2.74E-01       | 0.84(0.61-1.14) | 7.11E-01            | 1.12(0.66-2.0)  | 5.52E-01             | 0.72(0.36-1.43)  | 8.83E-02             | 0.72(0.49-1.04) | 4.07E-01               | 0.71(0.32-1.58)    |
| rs4917014 | 7   | 9038865   | JAZF1         | 4.88E-01   | 1.14(0.83-1.57) | 9.54E-01     | 1.01(0.63-1.64) | 1.31E-01         | 0.85(0.62-1.17) | 2.80E-02    | 1.42(1.03-1.96) | 5.03E-01  | 1.14(0.77-1.67) | 1.22E-01   | 0.76(0.55-1.09) | 1.29E-01       | 1.29(0.92-1.8)  | 7.13E-01            | 1.12(0.62-2.08) | 9.11E-01             | 0.96(0.46-1.99)  | 1.01E-01             | 1.41(0.92-2.15) | 7.46E-01               | 1.16(0.88-1.79)    |
| rs1088631 | 7   | 128594183 | IRF7          | 8.62E-01   | 0.96(0.64-1.45) | 5.46E-02     | 0.5(0.24-1.07)  | 9.37E-01         | 0.98(0.65-1.48) | 2.98E-01    | 0.76(0.51-1.16) | 1.96E-01  | 1.45(0.85-2.4)  | 8.50E-01   | 0.86(0.62-1.15) | 2.67E-01       | 1.27(0.84-1.94) | 3.65E-01            | 1.42(0.69-2.92) | 8.08E-01             | 1.13(0.43-3.96)  | 5.09E-01             | 1.19(0.72-2.0)  | 2.06E-01               | 0.59(0.23-1.51)    |
| rs2176340 | 8   | 11343973  | BLK           | 1.23E-01   | 1.31(0.94-1.84) | 2.55E-01     | 0.73(0.43-1.25) | 5.92E-01         | 0.91(0.65-1.27) | 6.08E-01    | 1.1(0.78-1.53)  | 6.44E-01  | 1.1(0.74-1.64)  | 6.51E-01   | 1.09(0.76-1.56) | 9.56E-01       | 1.01(0.71-1.44) | 7.30E-01            | 0.89(0.45-1.73) | 5.54E-01             | 0.79(0.38-1.65)  | 1.09E-01             | 1.45(0.92-2.26) | 4.15E-01               | 1.5(0.65-4.05)     |
| rs263652  | 10  | 9060936   | WDR5A         | 5.38E-01   | 0.91(0.68-1.23) | 6.61E-01     | 0.91(0.58-1.41) | 8.24E-01         | 0.97(0.72-1.3)  | 6.70E-01    | 1.07(0.79-1.43) | 5.63E-01  | 1.11(0.78-1.57) | 3.59E-01   | 0.86(0.63-1.19) | 6.98E-01       | 0.94(0.69-1.29) | 3.70E-02            | 1.86(1.01-3.44) | 3.89E-01             | 0.75(0.38-1.48)  | 4.46E-01             | 0.87(0.61-1.26) | 9.59E-01               | 1.02(0.47-2.28)    |
| rs4948496 | 10  | 6386517   | ARID1B        | 3.31E-02   | 0.75(0.54-0.97) | 1.66E-01     | 0.73(0.47-1.13) | 2.02E-02         | 0.7(0.52-0.95)  | 6.80E-01    | 0.94(0.71-1.26) | 6.18E-01  | 0.91(0.65-1.3)  | 6.84E-01   | 0.94(0.68-1.29) | 2.68E-01       | 0.84(0.61-1.14) | 8.28E-01            | 1.07(0.61-1.9)  | 9.74E-01             | 0.99(0.51-1.94)  | 5.14E-01             | 0.88(0.61-1.28) | 3.12E-01               | 1.3(0.59-2.86)     |
| rs1280200 | 11  | 566936    | IRF7          | 4.38E-01   | 1.15(0.78-1.7)  | 1.07E-01     | 1.52(0.89-2.59) | 2.64E-01         | 0.81(0.55-1.21) | 7.65E-01    | 1.06(0.75-1.58) | 8.32E-01  | 0.96(0.61-1.5)  | 9.09E-01   | 0.98(0.64-1.4)  | 7.38E-01       | 0.94(0.62-1.41) | 1.38E-01            | 0.55(0.22-1.37) | 9.06E-01             | 0.95(0.42-2.28)  | 7.65E-01             | 0.93(0.58-1.51) | 4.86E-01               | 1.45(0.45-4.65)    |
| rs2732549 | 11  | 35088399  | CD4A          | 8.62E-01   | 0.97(0.72-1.31) | 4.26E-01     | 0.83(0.53-1.29) | 3.82E-01         | 1.02(0.76-1.38) | 3.83E-01    | 0.87(0.65-1.18) | 1.59E-01  | 1.29(0.91-1.83) | 5.71E-01   | 0.91(0.66-1.25) | 6.13E-01       | 0.92(0.67-1.26) | 4.06E-01            | 1.29(0.71-2.35) | 7.40E-01             | 0.89(0.45-1.77)  | 1.63E-02             | 1.59(1.09-2.3)  | 1.21E-01               | 5.55(2.5-6.66)     |
| rs3794060 | 11  | 7118679   | DONKNAOSYNI   | 6.56E-01   | 0.93(0.68-1.27) | 2.44E-01     | 1.33(0.82-2.17) | 9.45E-01         | 0.99(0.73-1.35) | 9.33E-01    | 1.0(0.73-1.37)  | 4.69E-01  | 1.15(0.81-1.65) | 3.65E-01   | 0.86(0.61-1.19) | 9.25E-01       | 0.99(0.71-1.37) | 5.83E-01            | 0.84(0.47-1.53) | 8.96E-01             | 0.95(0.47-1.94)  | 5.43E-01             | 0.88(0.6-1.31)  | 2.14E-01               | 1.67(0.76-3.67)    |
|           |     |           |               |            |                 |              |                 |                  |                 |             |                 |           |                 |            |                 |                |                 |                     |                 |                      |                  |                      |                 |                        |                    |



























































































|              |                                                               |          |      |    |    |          |          |            |            |            |            |             |            |            |            |            |            |            |            |            |            |            |            |
|--------------|---------------------------------------------------------------|----------|------|----|----|----------|----------|------------|------------|------------|------------|-------------|------------|------------|------------|------------|------------|------------|------------|------------|------------|------------|------------|
| Discoid Rash | HISTIDINE METABOLISM                                          | KEGG     | 674  | 25 | 18 | 5.88E-01 | 9.96E-01 | rs17024981 | rs1788224  | rs4836277  | rs854121   | rs12605520  | rs16375090 | rs2107116  | rs6569455  | rs730870   | rs480245   | rs1968736  | rs1768267  | rs675631   | rs13809524 | rs1465936  | rs16840472 |
| Discoid Rash | NUCLEOTIDE LIKE PURINERGIC RECEPTORS                          | REACTOME | 272  | 16 |    | 5.91E-01 | 9.96E-01 | rs8112063  | rs1123571  | rs4814728  | rs7208308  | rs6440739   | rs1202765  | rs236481   | rs5104295  | rs382936   | rs1089906  |            |            |            |            |            |            |
| Discoid Rash | G PROTEIN ACTIVATION                                          | REACTOME | 703  | 21 |    | 5.91E-01 | 9.96E-01 | rs2159917  | rs91646    | rs3959759  | rs1181073  | rs1270672   | rs442611   | rs1106673  | rs3232987  | rs65042    | rs1468242  | rs287340   | rs955457   | rs121495   | rs1775118  |            |            |
| Discoid Rash | GLYCOYLATION                                                  | REACTOME | 790  | 42 |    | 5.92E-01 | 9.96E-01 | rs4927432  | rs107994   | rs1283632  | rs1283632  | rs1283632   | rs1283632  | rs1283632  | rs1283632  | rs1283632  | rs1283632  | rs1283632  | rs1283632  | rs1283632  | rs1283632  | rs1283632  | rs1283632  |
| Discoid Rash | PIP3 ACTIVATES AKT SIGNALING                                  | REACTOME | 587  | 21 |    | 5.92E-01 | 9.96E-01 | rs8734181  | rs7223396  | rs7810457  | rs1850409  | rs4943769   | rs8176205  | rs1189254  | rs312681   | rs1268160  | rs66821    | rs1202235  | rs1049228  | rs2954023  |            |            |            |
| Discoid Rash | SIGNALING_BY_ROBO_RECEPTOR                                    | REACTOME | 1030 | 32 |    | 5.93E-01 | 9.96E-01 | rs17031463 | rs6057009  | rs6797725  | rs10114970 | rs7612183   | rs2634771  | rs1843786  | rs98821    | rs2623769  | rs11697698 | rs1480689  | rs1719738  | rs692301   | rs1685896  | rs30438    | rs761026   |
| Discoid Rash | INSULIN PATHWAY                                               | BIOCARTA | 725  | 36 |    | 5.96E-01 | 9.96E-01 | rs4976132  | rs1490801  | rs6759915  | rs28118769 | rs7507911   | rs12150519 | rs4970288  | rs10739966 | rs1784488  | rs801305   | rs3719763  | rs1079379  | rs6775899  | rs1784842  | rs10940145 | rs1066323  |
| Discoid Rash | INSULIN PATHWAY                                               | BIOCARTA | 1253 | 29 |    | 5.96E-01 | 9.96E-01 | rs8096920  | rs23785383 | rs1245316  | rs1453342  | rs2179948   | rs392715   | rs958835   | rs17288929 | rs1180262  | rs140561   | rs6792241  | rs8015153  | rs11646540 | rs686525   | rs17557659 | rs7811655  |
| Discoid Rash | PHOSPHORYLATION_OF_THE_APC_C                                  | REACTOME | 219  | 15 |    | 5.96E-01 | 9.96E-01 | rs653414   | rs4688520  | rs11248087 | rs16941635 | rs9867568   | rs1775614  |            |            |            |            |            |            |            |            |            |            |
| Discoid Rash | REGULATORY_RNA_PATHWAYS                                       | REACTOME | 345  | 29 |    | 5.96E-01 | 9.96E-01 | rs7160403  | rs1083293  | rs12186785 | rs1781885  | rs100711108 | rs17408227 | rs3746162  | rs17146052 | rs2997025  |            |            |            |            |            |            |            |
| Discoid Rash | DIABETES_PATHWAYS                                             | REACTOME | 395  | 28 |    | 5.97E-01 | 9.96E-01 | rs1074311  | rs1362988  | rs6077718  | rs2172225  | rs1165607   | rs2136703  | rs294654   | rs6478233  | rs1199980  | rs2409403  | rs3415142  | rs1024175  | rs1737483  | rs703487   | rs1545229  | rs6893892  |
| Discoid Rash | TERMINATION_OF_O_GLYCAN BIOSYNTHESIS                          | REACTOME | 960  | 47 |    | 5.97E-01 | 9.96E-01 | rs2829241  | rs2404399  | rs6620381  | rs1804258  | rs8446209   | rs9811923  | rs10467147 | rs1804313  | rs1084566  | rs125287   | rs1049538  | rs1049538  | rs293346   | rs68301    | rs808430   | rs1001828  |
| Discoid Rash | GLYOXYLATE AND DICARBOXYLATE METABOLISM                       | KEGG     | 704  | 33 |    | 6.00E-01 | 9.96E-01 | rs15551790 | rs2346892  | rs117669   | rs2073069  | rs2423222   | rs1223881  | rs5466793  | rs8003379  | rs611598   | rs243322   | rs150831   | rs680023   | rs1037510  | rs122014   | rs727392   | rs4813     |
| Discoid Rash | NONSENSE MEDIATED DECAY ENHANCED BY THE EXON JUNCTION COMPLEX | REACTOME | 1261 | 33 |    | 6.01E-01 | 9.96E-01 | rs285822   | rs1298632  | rs1059398  | rs7751261  | rs108168    | rs55125    | rs128167   | rs64231    | rs46643    | rs37645    | rs1784209  | rs201558   | rs93429    | rs480323   | rs56631    | rs247315   |
| Discoid Rash | MITOCHONDRIAL_TRNA_AMINOACYLATION                             | REACTOME | 500  | 39 |    | 6.02E-01 | 9.96E-01 | rs2713834  | rs4699172  | rs2603838  | rs751261   | rs2326613   | rs411422   | rs409225   | rs6779394  | rs69277    | rs4466764  | rs2729085  | rs264108   | rs959186   | rs313664   | rs242931   | rs32139    |
| Discoid Rash | ADP_SIGNALING_THROUGH_PRR1                                    | REACTOME | 863  | 31 |    | 6.02E-01 | 9.96E-01 | rs2159917  | rs1049405  | rs931646   | rs695723   | rs4463623   | rs1811073  | rs1474779  | rs980444   | rs148757   | rs669755   | rs376504   | rs10686    | rs7786     | rs7825     | rs682744   | rs2873409  |
| Discoid Rash | XENOBIOTICS                                                   | REACTOME | 231  | 5  |    | 6.06E-01 | 9.96E-01 | rs1772597  | rs1950078  | rs1157212  | rs2970265  |             |            |            |            |            |            |            |            |            |            |            |            |
| Discoid Rash | DEADENYLATION_OF_MRNA                                         | REACTOME | 331  | 31 |    | 6.07E-01 | 9.96E-01 | rs438406   | rs1089606  | rs1112955  | rs3311602  | rs100251    | rs2361696  | rs1007831  | rs10740768 |            |            |            |            |            |            |            |            |
| Discoid Rash | DOWNSTREAM_TCR_SIGNALING                                      | REACTOME | 1573 | 45 |    | 6.07E-01 | 9.96E-01 | rs4976132  | rs1490801  | rs8734181  | rs1084353  | rs1845451   | rs1044404  | rs1710327  | rs7747353  | rs9276724  | rs270712   | rs4976208  | rs1004923  | rs1073996  | rs595025   | rs10485405 | rs283334   |
| Discoid Rash | FORMATION_OF_TUBULIN_FOLDING_INTERMEDIATES_BY_CCT_TRIC        | REACTOME | 227  | 9  |    | 6.08E-01 | 9.96E-01 | rs818299   | rs108794   | rs3852166  |            |             |            |            |            |            |            |            |            |            |            |            |            |
| Discoid Rash | ACTV_CHAIN_REMODELING_OF_PE                                   | REACTOME | 696  | 30 |    | 6.09E-01 | 9.96E-01 | rs1049405  | rs959732   | rs443808   | rs792406   | rs1471978   | rs90444    | rs148757   | rs766133   | rs672585   | rs7051     | rs105999   | rs76698    | rs76691    | rs973936   | rs682744   | rs129706   |
| Discoid Rash | AMINO_ACID_SYNTHESIS_AND_INTERCONVERSION_TRANSMINATION        | REACTOME | 580  | 21 |    | 6.11E-01 | 9.96E-01 | rs215703   | rs1229564  | rs1137606  | rs1087689  | rs1499531   | rs6291921  | rs1915     | rs1244537  | rs19492    | rs94443    | rs141026   | rs97978    | rs76801    | rs66655    | rs40005    | rs702179   |
| Discoid Rash | DEATH_PATHWAY                                                 | BIOCARTA | 505  | 22 |    | 6.14E-01 | 9.96E-01 | rs1048345  | rs1710327  | rs4605938  | rs365238   | rs4719793   | rs1693964  | rs9868605  | rs954945   | rs3850170  | rs1199732  | rs3783953  | rs716796   | rs724402   | rs2844930  | rs1437212  | rs120681   |
| Discoid Rash | PORPHYRIA_AND_CHLOROPHYLL_METABOLISM                          | KEGG     | 1163 | 58 |    | 6.14E-01 | 9.96E-01 | rs1002849  | rs117031   | rs10521    | rs2586795  | rs76194     | rs48226    | rs699512   | rs1007090  | rs6178404  | rs1661637  | rs686633   | rs294755   | rs1605975  | rs385339   | rs7650232  | rs18704    |
| Discoid Rash | NOTCH_SIGNALING_PATHWAY                                       | KEGG     | 1387 | 29 |    | 6.16E-01 | 9.96E-01 | rs2179688  | rs1160821  | rs6843495  | rs4923889  | rs1051952   | rs387681   | rs1264059  | rs33857    | rs708797   | rs1241734  | rs783948   | rs378051   | rs7650232  | rs18704    | rs684306   | rs57581    |
| Discoid Rash | VIP_PATHWAY                                                   | KEGG     | 1393 | 38 |    | 6.16E-01 | 9.96E-01 | rs2264888  | rs1272061  | rs12159917 | rs12159917 | rs12159917  | rs12159917 | rs12159917 | rs12159917 | rs12159917 | rs12159917 | rs12159917 | rs12159917 | rs12159917 | rs12159917 | rs12159917 | rs12159917 |
| Discoid Rash | GLYCEROPHOSPHOLIPID BIOSYNTHESIS                              | REACTOME | 2483 | 38 |    | 6.17E-01 | 9.96E-01 | rs2087179  | rs2292545  | rs655915   | rs4823104  | rs1214147   | rs1049405  | rs659732   | rs11127284 | rs446323   | rs6680326  | rs6072343  | rs341422   | rs792406   | rs474797   | rs2012024  | rs1559746  |
| Discoid Rash | RNA_POLYMERASE                                                | KEGG     | 351  | 21 |    | 6.17E-01 | 9.96E-01 | rs124537   | rs1712322  | rs378016   | rs763417   | rs7594007   | rs2423506  | rs3746162  | rs411207   | rs754950   |            |            |            |            |            |            |            |
| Discoid Rash | PROTEIN EXPORT                                                | KEGG     | 750  | 22 |    | 6.18E-01 | 9.96E-01 | rs3829406  | rs7811230  | rs12267330 | rs1551368  | rs1024511   | rs1390245  | rs109364   | rs108453   | rs1528035  | rs37642    | rs2065134  | rs801351   | rs694611   | rs1233432  | rs1156868  | rs1156334  |
| Discoid Rash | CELL_DEATH_SIGNALING_VIA_NG2_NG2                              | REACTOME | 1000 | 37 |    | 6.22E-01 | 9.96E-01 | rs2264888  | rs1275868  | rs1048539  | rs1719952  | rs1125745   | rs1710327  | rs1024511  | rs138599   | rs1700808  | rs2664537  | rs1050507  | rs1747549  | rs1141048  | rs491      | rs69856    | rs1786729  |
| Discoid Rash | RAP1_SIGNALING                                                | REACTOME | 855  | 32 |    | 6.23E-01 | 9.96E-01 | rs613071   | rs304077   | rs92001    | rs1217111  | rs1000160   | rs402981   | rs293131   | rs1024289  | rs1107339  | rs199169   | rs6968005  | rs1802     | rs2860493  | rs197683   | rs1058982  | rs480375   |
| Discoid Rash | BETA_ALANINE_METABOLISM                                       | KEGG     | 711  | 40 |    | 6.23E-01 | 9.96E-01 | rs379357   | rs117882   | rs4363277  | rs1625597  | rs58148     | rs822607   | rs290826   | rs1293056  | rs2605520  | rs2786529  | rs2401542  | rs1723422  | rs28107    | rs1634     | rs4085458  | rs1408353  |
| Discoid Rash | DRUG_METABOLISM_OTHER_ENZYMES                                 | KEGG     | 1609 | 52 |    | 6.25E-01 | 9.96E-01 | rs1002849  | rs1493793  | rs1202869  | rs1177597  | rs1625597   | rs290826   | rs290826   | rs145226   | rs1086508  | rs294755   | rs2811219  | rs1487302  | rs308830   | rs648997   | rs768364   | rs1804383  |
| Discoid Rash | CYCLOCHROME_P450_ARRANGED_BY_SUBSTRATE_TYPE                   | REACTOME | 1163 | 41 |    | 6.25E-01 | 9.96E-01 | rs2824205  | rs1746674  | rs9788636  | rs1773597  | rs658359    | rs292781   | rs1314026  | rs3720213  | rs1314633  | rs2277600  | rs1907609  | rs1590760  | rs695541   | rs4809958  | rs6546738  | rs1800440  |
| Discoid Rash | CELL_DEATH_SIGNALING_VIA_NG2_NG2                              | REACTOME | 2069 | 29 |    | 6.26E-01 | 9.96E-01 | rs2633293  | rs6679759  | rs1540656  | rs647067   | rs738957    | rs1074294  | rs1762622  | rs695938   | rs1167849  | rs800042   | rs214666   | rs1877330  | rs1023823  | rs3929121  | rs212496   | rs7280929  |
| Discoid Rash | REGULATION_OF_KIT_SIGNALING                                   | REACTOME | 587  | 21 |    | 6.27E-01 | 9.96E-01 | rs1544241  | rs1217175  | rs4358284  | rs371321   | rs1201022   | rs114146   | rs995970   | rs7229909  | rs605577   | rs1011614  | rs1456     | rs21202    |            |            |            |            |
| Discoid Rash | NA_CL_DEPENDENT_NEUROTRANSMITTER_TRANSPORT                    | REACTOME | 718  | 27 |    | 6.29E-01 | 9.96E-01 | rs1083369  | rs224169   | rs92601    | rs1108878  | rs290798    | rs3779723  | rs350658   | rs1046624  | rs237651   | rs1194100  | rs269713   | rs297159   | rs170885   | rs684213   |            |            |
| Discoid Rash | CELL_CELL_COMMUNICATION                                       | REACTOME | 9225 | 33 |    | 6.29E-01 | 9.96E-01 | rs2140825  | rs6766201  | rs4976132  | rs1142065  | rs17031463  | rs1330878  | rs7548909  | rs490801   | rs944248   | rs1296272  | rs108921   | rs4812668  | rs2068066  | rs157805   | rs189219   | rs682242   |
| Discoid Rash | ACTIVATED AMP STIMULATES FATTY ACID OXIDATION IN MUSCLE       | REACTOME | 212  | 13 |    | 6.29E-01 | 9.96E-01 | rs997032   | rs69830    | rs2025272  | rs27238    | rs187609    | rs201704   | rs127463   | rs226387   | rs1027823  | rs148316   | rs674295   | rs1497709  | rs40943    | rs246155   |            |            |
| Discoid Rash | AMINOACYL TRNA BIOSYNTHESIS                                   | KEGG     | 730  | 32 |    | 6.31E-01 | 9.96E-01 | rs675144   | rs20338    | rs3879938  | rs469986   | rs7751261   | rs1232661  | rs1441024  | rs49225    | rs6779394  | rs26744    | rs676674   | rs29085    | rs2064     | rs1088582  | rs313664   | rs282293   |
| Discoid Rash | PEROXISOMAL_LIPID_METABOLISM                                  | REACTOME | 435  | 11 |    | 6.32E-01 | 9.96E-01 | rs500800   | rs7788404  | rs485415   | rs994414   | rs1754418   | rs380257   | rs1675216  |            |            |            |            |            |            |            |            |            |
| Discoid Rash | ACETYLCHOLINE_BINDING_AND_DOWNSTREAM_EVENTS                   | REACTOME | 242  | 12 |    | 6.33E-01 | 9.96E-01 | rs445226   | rs701741   | rs935865   | rs1051971  | rs2741343   | rs1290458  | rs4072398  | rs107150   |            |            |            |            |            |            |            |            |
| Discoid Rash | IRON_UPTAKE_AND_TRANSPORT                                     | REACTOME | 1163 | 41 |    | 6.33E-01 | 9.96E-01 | rs2041689  | rs1098200  | rs868177   | rs19118    | rs1739259   | rs3580243  | rs1790943  | rs6861637  | rs1267009  | rs7423230  | rs1095421  | rs1997942  | rs2454039  | rs3786645  | rs1309526  | rs1266504  |
| Discoid Rash | GAB1_SIGNALING                                                | REACTOME | 1077 | 37 |    | 6.33E-01 | 9.96E-01 | rs4376132  | rs1221     | rs98081    | rs8734181  | rs7325969   | rs798104   | rs1850409  | rs494796   | rs98182    | rs1497628  | rs1073996  | rs18925    | rs1189254  | rs371023   | rs1007379  | rs1094145  |
| Discoid Rash | BASE_EXCISION_REPAIR                                          | KEGG     | 500  | 27 |    | 6.34E-01 | 9.96E-01 | rs3805169  | rs100907   | rs9580991  | rs1088366  | rs423068    | rs39460    | rs11402    | rs2950565  | rs2153608  | rs439493   | rs1236181  | rs3730463  | rs123561   | rs4840583  | rs6564980  | rs345803   |
| Discoid Rash | AMINO_SUGAR_AND_NUCLEOTIDE_SUGAR_METABOLISM                   | KEGG     | 956  | 34 |    | 6.35E-01 | 9.96E-01 | rs9391934  | rs11848    | rs1004779  | rs1102193  | rs7501212   | rs1001323  | rs100251   | rs4095050  | rs690932   | rs2173685  | rs163918   | rs1756100  | rs684732   | rs14736    | rs380064   | rs1394531  |
| Discoid Rash | COSTAMULATION_BY_THE_CD28_FAMILY                              | REACTOME | 3679 | 52 |    | 6.38E-01 | 9.96E-01 | rs4976132  | rs1490801  | rs217260   | rs3720213  | rs104405    | rs1544241  | rs497628   | rs1693964  | rs4347980  | rs1011     |            |            |            |            |            |            |

|              |                                                                                 |          |      |    |    |
|--------------|---------------------------------------------------------------------------------|----------|------|----|----|
| Discoid Rash | EGFR_DOWNREGULATION                                                             | REACTOME | 1037 | 29 | 20 |
| Discoid Rash | HOMOLOGOUS_RECOMBINATION                                                        | KEGG     | 730  | 24 | 14 |
| Discoid Rash | UNFOLDED_PROTEIN_RESPONSE                                                       | REACTOME | 1176 | 32 | 20 |
| Discoid Rash | GLYCOGEN_METABOLISM_PATHWAY                                                     | KEGG     | 1290 | 39 | 20 |
| Discoid Rash | CGMP_EFFECTS                                                                    | REACTOME | 1120 | 44 | 20 |
| Discoid Rash | RNA_POL_III_TRANSCRIPTION                                                       | REACTOME | 875  | 45 | 20 |
| Discoid Rash | TAK1_ACTIVATES_NFKB_BY_PHOSPHORYLATION_AND_ACTIVATION_OF_IKKS_COMPLEX           | REACTOME | 777  | 37 | 20 |
| Discoid Rash | AD_PATHWAY                                                                      | BIOCARTA | 927  | 37 | 20 |
| Discoid Rash | GLUCAGON_TYRE_LIGAND_RECEPTORS                                                  | REACTOME | 786  | 29 | 20 |
| Discoid Rash | CD28_CO_STIMULATION                                                             | REACTOME | 797  | 31 | 19 |
| Discoid Rash | SYNTHESIS_OF_BILE_ACIDS_AND_BILE_SALTS                                          | REACTOME | 546  | 6  | 5  |
| Discoid Rash | TRAF3_MEDIATED_IRF7_ACTIVATION                                                  | REACTOME | 433  | 34 | 10 |
| Discoid Rash | SIGNALING_BY_NODAL                                                              | REACTOME | 927  | 37 | 20 |
| Discoid Rash | SIGNALING_BY_BMP                                                                | REACTOME | 918  | 35 | 15 |
| Discoid Rash | FATTY_ACYL_COA_BIOSYNTHESIS                                                     | REACTOME | 404  | 26 | 14 |
| Discoid Rash | CONVERSION_FROM_APC_C_CDC20_TO_APC_C_CDH1_IN_LATE_ANAPHASE                      | REACTOME | 188  | 17 | 7  |
| Discoid Rash | GATA3_PATHWAY                                                                   | BIOCARTA | 41   | 20 | 20 |
| Discoid Rash | APPTOSIS                                                                        | KEGG     | 1226 | 33 | 20 |
| Discoid Rash | ACTIVATED_TAK1_MEDIATES_P38_MAPK_ACTIVATION                                     | REACTOME | 649  | 32 | 16 |
| Discoid Rash | M_G_TRANSITION                                                                  | REACTOME | 1315 | 34 | 20 |
| Discoid Rash | METABOLISM_OF_MIRNA                                                             | REACTOME | 2017 | 31 | 20 |
| Discoid Rash | FATTY_ACID_TRIACYLGLYCEROL_AND_KETONE_BODY_METABOLISM                           | REACTOME | 5526 | 32 | 20 |
| Discoid Rash | NOD_LIKE_RECEPTOR_SIGNALING_PATHWAY                                             | KEGG     | 1406 | 37 | 20 |
| Discoid Rash | OXIDATIVE_PHOSPHORYLATION                                                       | KEGG     | 2486 | 35 | 20 |
| Discoid Rash | STRESS_PATHWAY                                                                  | BIOCARTA | 633  | 30 | 17 |
| Discoid Rash | REGULATION_OF_APOPTOSIS                                                         | REACTOME | 1432 | 42 | 20 |
| Discoid Rash | CHONDROITIN_SULFATE_BIOSYNTHESIS                                                | REACTOME | 846  | 24 | 18 |
| Discoid Rash | IGF1_PATHWAY                                                                    | BIOCARTA | 813  | 34 | 20 |
| Discoid Rash | TGF_BETA_SIGNALING_PATHWAY                                                      | KEGG     | 3535 | 35 | 20 |
| Discoid Rash | GLUCOSE_METABOLISM                                                              | REACTOME | 544  | 32 | 20 |
| Discoid Rash | UCALPAIN_PATHWAY                                                                | BIOCARTA | 424  | 26 | 16 |
| Discoid Rash | CHONDROITIN_SULFATE_DERMATAN_SULFATE_METABOLISM                                 | REACTOME | 278  | 25 | 16 |
| Discoid Rash | METABOLISM_OF_XENOBIOTICS_BY_CYTOCHROME_P450                                    | KEGG     | 1474 | 53 | 20 |
| Discoid Rash | COMPLEMENT_AND_COAGULATION_CASCADES                                             | KEGG     | 174  | 28 | 20 |
| Discoid Rash | TOLL_LIKE_RECEPTOR_SIGNALING_PATHWAY                                            | KEGG     | 2339 | 34 | 20 |
| Discoid Rash | BIOPETIDES_PATHWAY                                                              | BIOCARTA | 1081 | 32 | 20 |
| Discoid Rash | NOTCH1_INTRACELLULAR_DOMAIN_REGULATES_TRANSCRIPTION                             | REACTOME | 2852 | 25 | 16 |
| Discoid Rash | SPHINGOLIPID_DE_NOVO_BIOSYNTHESIS                                               | REACTOME | 1020 | 33 | 20 |
| Discoid Rash | MCM_PATHWAY                                                                     | BIOCARTA | 234  | 6  | 5  |
| Discoid Rash | RIBOFLAVIN_METABOLISM                                                           | KEGG     | 295  | 24 | 10 |
| Discoid Rash | INITIAL_TRIGGERING_OF_COMPLEMENT                                                | REACTOME | 434  | 19 | 14 |
| Discoid Rash | CALCIUMININ_PATHWAY                                                             | BIOCARTA | 895  | 33 | 20 |
| Discoid Rash | SYNTHESIS_SECRETION_AND_INACTIVATION_OF_GLIPI                                   | REACTOME | 174  | 28 | 20 |
| Discoid Rash | THROMBOXANE_SIGNALING_THROUGH_TG_RECEPTOR                                       | REACTOME | 492  | 15 | 11 |
| Discoid Rash | PROGESTERONE_MEDIATED_OOCYTE_MATURATION                                         | KEGG     | 2535 | 45 | 20 |
| Discoid Rash | TCR_SIGNALING                                                                   | REACTOME | 2048 | 24 | 19 |
| Discoid Rash | TCR_PATHWAY                                                                     | BIOCARTA | 218  | 24 | 19 |
| Discoid Rash | CDK_MEDIATED_PHOSPHORYLATION_AND_REMOVAL_OF_CDC6                                | REACTOME | 698  | 29 | 20 |
| Discoid Rash | SHH_PATHWAY                                                                     | KEGG     | 679  | 20 | 14 |
| Discoid Rash | GLYCOSPHINGOLIPID_BIOSYNTHESIS_LACTO_AND_NEOLACTO_SERIES                        | BIOCARTA | 10   | 14 | 13 |
| Discoid Rash | MITOTIC_PROMETAPHASE                                                            | REACTOME | 1814 | 37 | 20 |
| Discoid Rash | CYCLIN_E_ASSOCIATED_EVENTS_DURING_G1_S_TRANSITION                               | REACTOME | 1212 | 36 | 20 |
| Discoid Rash | PARKINSONS_DISEASE                                                              | KEGG     | 2833 | 31 | 20 |
| Discoid Rash | AMYOTROPIC_LATERAL_SCLEROSIS_ALS                                                | KEGG     | 1813 | 25 | 16 |
| Discoid Rash | FDI_SIGNALING                                                                   | REACTOME | 988  | 30 | 17 |
| Discoid Rash | MEIOSIS                                                                         | BIOCARTA | 1674 | 39 | 20 |
| Discoid Rash | GENERATION_OF_SECOND_MESSENGER_MOLECULES                                        | REACTOME | 616  | 34 | 18 |
| Discoid Rash | NEFAT_PATHWAY                                                                   | BIOCARTA | 1626 | 40 | 20 |
| Discoid Rash | TOLL_RECEPTOR_CASCADES                                                          | REACTOME | 3778 | 25 | 20 |
| Discoid Rash | VEF_MEDIATED_DEGRADATION_OF_APOBEC3                                             | REACTOME | 1154 | 38 | 20 |
| Discoid Rash | TRANSPORT_OF_VITAMINS_NUCLEOSIDES_AND_RELATED_MOLECULES                         | REACTOME | 1154 | 38 | 20 |
| Discoid Rash | LONG_TERM_POTENTIATION                                                          | KEGG     | 3260 | 37 | 20 |
| Discoid Rash | MITOTIC_M_M_G1_PHASES                                                           | REACTOME | 3176 | 36 | 20 |
| Discoid Rash | INTEGRATION_OF_ENERGY_METABOLISM                                                | REACTOME | 4501 | 34 | 20 |
| Discoid Rash | MIRNA_PROCESSING                                                                | REACTOME | 1942 | 28 | 20 |
| Discoid Rash | PK2_PATHWAY                                                                     | BIOCARTA | 752  | 40 | 20 |
| Discoid Rash | CYTOKINE_PATHWAY                                                                | BIOCARTA | 491  | 21 | 14 |
| Discoid Rash | IL10_PATHWAY                                                                    | BIOCARTA | 2301 | 36 | 20 |
| Discoid Rash | CELL_JUNCTION_ORGANIZATION                                                      | REACTOME | 6981 | 34 | 20 |
| Discoid Rash | MEIOTIC_RECOMBINATION                                                           | REACTOME | 983  | 33 | 16 |
| Discoid Rash | PPARA_ACTIVATES_GENE_EXPRESSION                                                 | REACTOME | 3675 | 34 | 20 |
| Discoid Rash | CACAE_PATHWAY                                                                   | BIOCARTA | 385  | 13 | 7  |
| Discoid Rash | MIRNA_CAPPING                                                                   | REACTOME | 8    | 5  | 5  |
| Discoid Rash | LIGAND_GATED_ION_CHANNEL_TRANSPORT                                              | REACTOME | 7    | 9  | 5  |
| Discoid Rash | CHREBP2_PATHWAY                                                                 | BIOCARTA | 1059 | 52 | 20 |
| Discoid Rash | P53_PATHWAY                                                                     | BIOCARTA | 347  | 12 | 7  |
| Discoid Rash | FORMATION_OF_TRANSCRIPTION_COUPLED_NER_TC_NER_REPAIR_COMPLEX                    | REACTOME | 389  | 9  | 5  |
| Discoid Rash | REGULATION_OF_INSULIN_SECRETION                                                 | REACTOME | 571  | 32 | 20 |
| Discoid Rash | AUTODEGRADATION_OF_THE_E3_UBIQUITIN_LIGASE_COPI                                 | REACTOME | 766  | 26 | 16 |
| Discoid Rash | TRANSMISSION_ACROSS_CHEMICAL_SYNAPSES                                           | REACTOME | 989  | 28 | 20 |
| Discoid Rash | PI_METABOLISM                                                                   | REACTOME | 691  | 31 | 20 |
| Discoid Rash | THROMBIN_SIGNALING_THROUGH_PROTEINASE_ACTIVATED_RECEPTORS_PARS                  | REACTOME | 17   | 13 | 7  |
| Discoid Rash | APC_C_CDH1_MEDIATED_DEGRADATION_OF_CDC20_AND_OTHER_APC_C_CDH1_TARGETS           | REACTOME | 959  | 35 | 20 |
| Discoid Rash | TE MITOSIS_EARLY_G1                                                             | REACTOME | 18   | 12 | 8  |
| Discoid Rash | ENDOSOMAL_SORTING_COMPLEX_REQUIRED_FOR_TRANSPORT_ESCRT                          | REACTOME | 1808 | 38 | 20 |
| Discoid Rash | MITOCHONDRIA_PATHWAY                                                            | BIOCARTA | 317  | 4  | 20 |
| Discoid Rash | PYRIDIMINE_METABOLISM                                                           | REACTOME | 792  | 44 | 20 |
| Discoid Rash | JNK_C_JUN_KINASE_PHOSPHORYLATION_AND_ACTIVATION_MEDIATED_BY_ACTIVATED_RECEPTORS | REACTOME | 172  | 37 | 17 |
| Discoid Rash | KERATINOCTYTE_PATHWAY                                                           | BIOCARTA | 958  | 30 | 20 |





























































































































### 2.3 Table S3. Association results of the SNPs from the VEGF pathway associated with oral ulcers in SLE.

| POPULATION  | SNP        | CHR | POSITION  | A1 | A2 | OR   | P       | GENE          |
|-------------|------------|-----|-----------|----|----|------|---------|---------------|
| Discovery   | rs2373929  | 7   | 150714812 | A  | G  | 1.91 | 2.64E-5 | <i>NOS3</i>   |
| Discovery   | rs17709898 | 4   | 55957723  | G  | A  | 0.53 | 1.50E-4 | <i>KDR</i>    |
| Discovery   | rs743507   | 7   | 150707488 | G  | A  | 0.53 | 2.61E-4 | <i>NOS3</i>   |
| Discovery   | rs10940145 | 5   | 67290972  | G  | A  | 0.55 | 3.26E-4 | <i>PIK3R1</i> |
| Discovery   | rs7396875  | 11  | 551405    | G  | A  | 2.01 | 7.16E-4 | <i>HRAS</i>   |
| Discovery   | rs7726943  | 5   | 67818581  | G  | A  | 1.68 | 7.80E-4 | <i>PIK3R1</i> |
| Discovery   | rs10461535 | 5   | 67218216  | G  | A  | 2.17 | 1.30E-3 | <i>PIK3R1</i> |
| Discovery   | rs227913   | 17  | 64607394  | C  | A  | 0.62 | 2.67E-3 | <i>PRKCA</i>  |
| Discovery   | rs2372183  | 5   | 67197955  | A  | G  | 2.06 | 2.98E-3 | <i>PIK3R1</i> |
| Discovery   | rs4976028  | 5   | 67290733  | G  | A  | 1.70 | 3.46E-3 | <i>PIK3R1</i> |
| Discovery   | rs904132   | 4   | 55802108  | G  | A  | 0.40 | 5.78E-3 | <i>KDR</i>    |
| Discovery   | rs11133360 | 4   | 55982752  | G  | A  | 0.67 | 7.40E-3 | <i>KDR</i>    |
| Discovery   | rs9892886  | 17  | 64382588  | G  | A  | 1.73 | 8.06E-3 | <i>PRKCA</i>  |
| Discovery   | rs11860367 | 16  | 24011167  | G  | A  | 0.66 | 8.25E-3 | <i>PRKCB</i>  |
| Discovery   | rs10515068 | 5   | 67450499  | C  | A  | 1.61 | 1.02E-2 | <i>PIK3R1</i> |
| Discovery   | rs7719763  | 5   | 67681425  | A  | G  | 1.47 | 1.38E-2 | <i>PIK3R1</i> |
| Discovery   | rs8051034  | 16  | 23925134  | C  | A  | 0.40 | 1.53E-2 | <i>PRKCB</i>  |
| Discovery   | rs863818   | 5   | 67554023  | G  | A  | 0.69 | 1.65E-2 | <i>PIK3R1</i> |
| Discovery   | rs10515059 | 5   | 67241677  | A  | C  | 0.65 | 2.22E-2 | <i>PIK3R1</i> |
| Discovery   | rs6504424  | 17  | 64387328  | G  | A  | 1.49 | 2.27E-2 | <i>PRKCA</i>  |
| Replication | rs17626553 | 13  | 28968770  | G  | A  | 0.43 | 2.35E-4 | <i>FLT1</i>   |
| Replication | rs1324057  | 13  | 28925435  | A  | G  | 0.52 | 2.56E-4 | <i>FLT1</i>   |
| Replication | rs11959164 | 5   | 180096972 | G  | A  | 1.61 | 1.44E-3 | <i>FLT4</i>   |
| Replication | rs10515077 | 5   | 67613801  | C  | A  | 2.26 | 2.86E-3 | <i>PIK3R1</i> |
| Replication | rs6129760  | 20  | 39746403  | G  | A  | 1.61 | 3.29E-3 | <i>PLCG1</i>  |
| Replication | rs11744801 | 5   | 67301383  | C  | A  | 0.56 | 3.56E-3 | <i>PIK3R1</i> |
| Replication | rs7202459  | 16  | 24039013  | G  | A  | 0.64 | 4.25E-3 | <i>PRKCB</i>  |
| Replication | rs6842830  | 4   | 55873926  | G  | A  | 0.65 | 4.31E-3 | <i>KDR</i>    |
| Replication | rs3844278  | 3   | 10211918  | A  | G  | 0.52 | 5.15E-3 | <i>VHL</i>    |
| Replication | rs9550377  | 13  | 29101681  | A  | G  | 2.03 | 8.17E-3 | <i>FLT1</i>   |
| Replication | rs2228246  | 20  | 39792063  | G  | A  | 0.59 | 8.75E-3 | <i>PLCG1</i>  |
| Replication | rs17086609 | 13  | 28929711  | G  | A  | 1.50 | 1.02E-2 | <i>FLT1</i>   |
| Replication | rs10067755 | 5   | 67307462  | G  | A  | 1.46 | 1.15E-2 | <i>PIK3R1</i> |
| Replication | rs6947821  | 7   | 150729212 | G  | A  | 1.48 | 1.21E-2 | <i>NOS3</i>   |
| Replication | rs4290512  | 17  | 64395039  | A  | C  | 0.43 | 1.39E-2 | <i>PRKCA</i>  |
| Replication | rs2283540  | 16  | 24130770  | A  | G  | 0.68 | 1.53E-2 | <i>PRKCB</i>  |
| Replication | rs708030   | 3   | 10212494  | G  | A  | 1.43 | 1.83E-2 | <i>VHL</i>    |
| Replication | rs10283368 | 8   | 141679817 | A  | G  | 0.70 | 2.00E-2 | <i>PTK2</i>   |
| Replication | rs4791036  | 17  | 64797135  | G  | A  | 0.62 | 2.29E-2 | <i>PRKCA</i>  |
| Replication | rs2125489  | 4   | 55953483  | A  | G  | 0.55 | 2.39E-2 | <i>KDR</i>    |

Abbreviations: A1, minor allele; A2, major allele; Chr, chromosome; Position, SNP base pair in build GRCh37/hg19; OR, Odds Ratio; P, P-value obtained from the single-marker association analysis; SNP, Single-Nucleotide Polymorphism.

## 2.4 Table S4. Statistical significance of the differential expression analysis performed on the VEGF pathway genes after immunotherapy.

| GENE          | P <sub>BETAMETHASONE VALERATE</sub> | P <sub>IMIQUIMOD</sub> | P <sub>DIPHENCYPRONE</sub> | P <sub>PIMECROLIMUS</sub> |
|---------------|-------------------------------------|------------------------|----------------------------|---------------------------|
| <i>ARNT</i>   | 1,10E-02                            | 5,26E-03               | 1,22E-01                   | 2,63E-02                  |
| <i>EIF1</i>   | 4,93E-02                            | 2,65E-06               | 6,68E-04                   | 3,31E-01                  |
| <i>EIF1AX</i> | 6,93E-02                            | 2,88E-03               | 1,33E-01                   | 5,56E-01                  |
| <i>EIF2B1</i> | 6,82E-01                            | 6,49E-03               | 9,26E-01                   | 7,20E-01                  |
| <i>EIF2B2</i> | 1,87E-02                            | 2,99E-01               | 4,66E-01                   | 1,86E-01                  |
| <i>EIF2B3</i> | 3,57E-01                            | 5,91E-01               | 4,15E-02                   | 8,83E-01                  |
| <i>EIF2B4</i> | 8,87E-03                            | 7,67E-01               | 1,25E-01                   | 3,33E-01                  |
| <i>EIF2B5</i> | 8,20E-01                            | 4,92E-01               | 3,61E-01                   | 8,41E-01                  |
| <i>EIF2S1</i> | 2,37E-03                            | 7,54E-03               | 1,20E-01                   | 1,16E-02                  |
| <i>EIF2S2</i> | 1,20E-01                            | 7,64E-06               | 2,18E-03                   | 2,63E-01                  |
| <i>EIF2S3</i> | 2,57E-01                            | 1,69E-02               | 1,64E-01                   | 5,93E-01                  |
| <i>ELAVL1</i> | 5,34E-03                            | 6,83E-03               | 4,95E-02                   | 1,61E-01                  |
| <i>FLT1</i>   | 4,86E-03                            | 1,70E-02               | 6,32E-02                   | 5,89E-02                  |
| <i>FLT4</i>   | 3,05E-01                            | 2,73E-01               | 2,11E-01                   | 2,91E-01                  |
| <i>HIF1A</i>  | 1,76E-01                            | 2,46E-02               | 9,17E-02                   | 6,53E-01                  |
| <i>HRAS</i>   | 1,04E-03                            | 1,21E-08               | 5,19E-01                   | 2,78E-02                  |
| <i>KDR</i>    | 1,80E-01                            | 6,39E-02               | 3,55E-01                   | 2,94E-01                  |
| <i>NOS3</i>   | 6,31E-01                            | 6,32E-01               | 3,96E-01                   | 3,21E-01                  |
| <i>PIK3CA</i> | 9,54E-02                            | 1,42E-08               | 1,09E-01                   | 1,62E-01                  |
| <i>PIK3CG</i> | 2,08E-01                            | 1,95E-01               | 1,85E-01                   | 5,18E-01                  |
| <i>PIK3R1</i> | 1,12E-04                            | 4,70E-06               | 2,76E-04                   | 1,66E-01                  |
| <i>PLCG1</i>  | 2,44E-01                            | 2,06E-01               | 1,74E-02                   | 1,91E-01                  |
| <i>PRKCA</i>  | 1,84E-01                            | 2,50E-01               | 1,75E-01                   | 1,82E-01                  |
| <i>PRKCB</i>  | 3,19E-01                            | 5,34E-02               | 1,56E-01                   | 3,53E-01                  |
| <i>PTK2</i>   | 3,01E-04                            | 6,72E-09               | 7,51E-02                   | 1,44E-01                  |
| <i>PXN</i>    | 2,18E-01                            | 8,53E-02               | 4,97E-01                   | 1,08E-01                  |
| <i>SHC1</i>   | 4,17E-04                            | 9,64E-03               | 2,94E-01                   | 9,82E-02                  |
| <i>VEGFA</i>  | 2,24E-04                            | 2,20E-11               | 3,34E-02                   | 2,88E-02                  |
| <i>VHL</i>    | 6,66E-02                            | 7,61E-02               | 2,64E-01                   | 5,51E-01                  |

Abbreviations: Gene, gene from the VEGF genetic pathway (only the most significant probe was considered for those genes mapped by more than one probe); P<sub>BETAMETHASONE VALERATE</sub>, P-value obtained from the differential expression analysis comparing samples before (N=10) and after (N=10) betamethasone valerate treatment; P<sub>DIPHENCYPRONE</sub>, P-value obtained from the differential expression analysis comparing samples before (N=22) and after (N=22) diphencyprone treatment; P<sub>IMIQUIMOD</sub>, P-value obtained from the differential expression analysis comparing samples before (N=6) and after (N=54) imiquimod treatment; P<sub>PIMECROLIMUS</sub>, P-value obtained from the differential expression analysis comparing samples before (N=10) and after (N=10) pimecrolimus treatment.

**2.5 Table S5. Statistical significance of the VEGF genetic pathway perturbation after topical immunotherapy.**

| <b>VEGF PATHWAY</b>    | <b>BETAMETHASONE VALERATE</b> | <b>IMIQUIMOD</b> | <b>DIPHENCYPRONE</b> | <b>PIMECROLIMUS</b> |
|------------------------|-------------------------------|------------------|----------------------|---------------------|
| <b>DEG (n)</b>         | 12                            | 16               | 7                    | 4                   |
| <b>NDEG (n)</b>        | 17                            | 13               | 22                   | 25                  |
| <b>Total Genes (n)</b> | 29                            | 29               | 29                   | 29                  |
| <b>P-value</b>         | 5.69E-9                       | 5.38E-14         | 4.59E-4              | 5.50E-2             |

Abbreviations: DEG, number of VEGF pathway genes that were differentially expressed comparing untreated and treated samples ( $P < 0.05$ ); NDEG, number of VEGF pathway genes that were not differentially expressed comparing untreated and treated samples ( $P > 0.05$ ); P-value, statistical significance of the VEGF genetic pathway perturbation (Binomial test); Total Genes, total number of genes mapping to the VEGF genetic pathway; VEGF pathway, features of the VEGF genetic pathway related with the differential gene expression analysis.

## 2.6 Table S6. Established genetic variants for SLE risk.

| SNP        | CHR | POSITION  | LOCUS                | RISK ALLELE |
|------------|-----|-----------|----------------------|-------------|
| rs2476601  | 1   | 114377568 | <i>PTPN22</i>        | A           |
| rs1801274  | 1   | 161479745 | <i>FCGR2A</i>        | C           |
| rs704840   | 1   | 173226195 | <i>TNFSF4</i>        | G           |
| rs17849501 | 1   | 183542323 | <i>SMG7-NCF2</i>     | T           |
| rs3024505  | 1   | 206939904 | <i>IL10</i>          | T           |
| rs9782955  | 1   | 236039877 | <i>LYST</i>          | C           |
| rs2111485  | 2   | 163110536 | <i>IFIH1</i>         | G           |
| rs3768792  | 2   | 213871709 | <i>IKZF2</i>         | C           |
| rs6740462  | 2   | 65667272  | <i>SPRED2</i>        | A           |
| rs11889341 | 2   | 191943742 | <i>STAT4</i>         | T           |
| rs9311676  | 3   | 58470351  | <i>ABHD6-PXK</i>     | C           |
| rs564799   | 3   | 159728987 | <i>IL12A</i>         | C           |
| rs10028805 | 4   | 102737250 | <i>BANK1</i>         | G           |
| rs7726414  | 5   | 133431834 | <i>TCF7-SKP1</i>     | T           |
| rs10036748 | 5   | 150458146 | <i>TNIP1</i>         | T           |
| rs2431697  | 5   | 159879978 | <i>MIR146A</i>       | T           |
| rs9462027  | 6   | 34797241  | <i>UHRF1BP1</i>      | A           |
| rs6568431  | 6   | 106588806 | <i>PRDM1-ATG5</i>    | A           |
| rs6932056  | 6   | 138242437 | <i>TNFAIP3</i>       | C           |
| rs1270942  | 6   | 31918860  | <i>MHC class III</i> | C           |
| rs849142   | 7   | 28185891  | <i>JAZF1</i>         | A           |
| rs4917014  | 7   | 50305863  | <i>IKZF1</i>         | T           |
| rs10488631 | 7   | 128594183 | <i>IRF5</i>          | C           |
| rs2736340  | 8   | 11343973  | <i>BLK</i>           | T           |
| rs2663052  | 10  | 50069395  | <i>WDFY4</i>         | C           |
| rs4948496  | 10  | 63805617  | <i>ARID5B</i>        | C           |
| rs3794060  | 11  | 71187679  | <i>DHCR7-NADSYN1</i> | C           |
| rs2732549  | 11  | 35088399  | <i>CD44</i>          | T           |
| rs7941765  | 11  | 128499000 | <i>ETS1-FLI1</i>     | C           |
| rs12802200 | 11  | 566936    | <i>IRF7</i>          | C           |
| rs10774625 | 12  | 111910219 | <i>SH2B3</i>         | A           |
| rs1059312  | 12  | 129278864 | <i>SLC15A4</i>       | C           |
| rs4902562  | 14  | 68731458  | <i>RAD51B</i>        | A           |
| rs2289583  | 15  | 75311036  | <i>CSK</i>           | A           |
| rs9652601  | 16  | 11174365  | <i>CIITA-SOCS1</i>   | G           |
| rs34572943 | 16  | 31272353  | <i>ITGAM</i>         | A           |
| rs11644034 | 16  | 85972612  | <i>IRF8</i>          | G           |
| rs2286672  | 17  | 4712617   | <i>PLD2</i>          | T           |
| rs2941509  | 17  | 37921194  | <i>IKZF3</i>         | A           |
| rs2304256  | 19  | 10475652  | <i>TYK2</i>          | C           |
| rs7444     | 22  | 21976934  | <i>UBE2L3</i>        | C           |
| rs887369   | X   | 30577846  | <i>CXorf21</i>       | C           |
| rs1734787  | X   | 153325446 | <i>IRAK1-MECP2</i>   | C           |

**Abbreviations:** Chr, chromosome; Position, SNP base pair in build GRCh37/hg19; SNP, Single-Nucleotide Polymorphism.



## 2.7 Table S7. Reference biological pathways selected for the present study.

| PATHWAY               | DATABASE | GENES |
|-----------------------|----------|-------|
| RELA_PATHWAY          | BIOCARTA | 16    |
| BCELLSURVIVAL_PATHWAY | BIOCARTA | 16    |
| CACAM_PATHWAY         | BIOCARTA | 16    |
| CDMAC_PATHWAY         | BIOCARTA | 16    |
| EIF_PATHWAY           | BIOCARTA | 16    |
| GATA3_PATHWAY         | BIOCARTA | 16    |
| IL22BP_PATHWAY        | BIOCARTA | 16    |
| P53_PATHWAY           | BIOCARTA | 16    |
| ACH_PATHWAY           | BIOCARTA | 16    |
| CDC42RAC_PATHWAY      | BIOCARTA | 16    |
| SHH_PATHWAY           | BIOCARTA | 16    |
| LAIR_PATHWAY          | BIOCARTA | 17    |
| HCMV_PATHWAY          | BIOCARTA | 17    |
| IL17_PATHWAY          | BIOCARTA | 17    |
| IL10_PATHWAY          | BIOCARTA | 17    |
| IL7_PATHWAY           | BIOCARTA | 17    |
| NO2IL12_PATHWAY       | BIOCARTA | 17    |
| CK1_PATHWAY           | BIOCARTA | 17    |
| PML_PATHWAY           | BIOCARTA | 17    |
| 41BB_PATHWAY          | BIOCARTA | 17    |
| ARF_PATHWAY           | BIOCARTA | 17    |
| ARAP_PATHWAY          | BIOCARTA | 18    |
| MCM_PATHWAY           | BIOCARTA | 18    |
| ETS_PATHWAY           | BIOCARTA | 18    |
| NGF_PATHWAY           | BIOCARTA | 18    |
| PTEN_PATHWAY          | BIOCARTA | 18    |
| CARDIACEGF_PATHWAY    | BIOCARTA | 18    |
| ERK5_PATHWAY          | BIOCARTA | 18    |
| SPRY_PATHWAY          | BIOCARTA | 18    |
| TEL_PATHWAY           | BIOCARTA | 18    |
| TNFR2_PATHWAY         | BIOCARTA | 18    |
| UCALPAIN_PATHWAY      | BIOCARTA | 18    |
| TID_PATHWAY           | BIOCARTA | 19    |
| COMP_PATHWAY          | BIOCARTA | 19    |
| MTA3_PATHWAY          | BIOCARTA | 19    |
| EPO_PATHWAY           | BIOCARTA | 19    |
| MAL_PATHWAY           | BIOCARTA | 19    |
| STATHMIN_PATHWAY      | BIOCARTA | 19    |
| TGF $\beta$ _PATHWAY  | BIOCARTA | 19    |
| TH1TH2_PATHWAY        | BIOCARTA | 19    |
| AMI_PATHWAY           | BIOCARTA | 20    |
| ATM_PATHWAY           | BIOCARTA | 20    |
| CCR5_PATHWAY          | BIOCARTA | 20    |
| NKCELLS_PATHWAY       | BIOCARTA | 20    |
| IGF1MOTOR_PATHWAY     | BIOCARTA | 20    |
| ACTINY_PATHWAY        | BIOCARTA | 20    |
| CALCINEURIN_PATHWAY   | BIOCARTA | 21    |
| NDKDYNAMIN_PATHWAY    | BIOCARTA | 21    |
| IGF1_PATHWAY          | BIOCARTA | 21    |
| ATRBRCA_PATHWAY       | BIOCARTA | 21    |
| MITOCHONDRIA_PATHWAY  | BIOCARTA | 21    |
| TOB1_PATHWAY          | BIOCARTA | 21    |
| CTLA4_PATHWAY         | BIOCARTA | 21    |
| TFF_PATHWAY           | BIOCARTA | 21    |
| AKT_PATHWAY           | BIOCARTA | 22    |
| CHEMICAL_PATHWAY      | BIOCARTA | 22    |
| SPPA_PATHWAY          | BIOCARTA | 22    |
| CERAMIDE_PATHWAY      | BIOCARTA | 22    |
| GCR_PATHWAY           | BIOCARTA | 22    |
| CYTOKINE_PATHWAY      | BIOCARTA | 22    |
| DC_PATHWAY            | BIOCARTA | 22    |
| IL2_PATHWAY           | BIOCARTA | 22    |
| IL6_PATHWAY           | BIOCARTA | 22    |
| INSULIN_PATHWAY       | BIOCARTA | 22    |
| HER2_PATHWAY          | BIOCARTA | 22    |
| CASPASE_PATHWAY       | BIOCARTA | 23    |
| CCR3_PATHWAY          | BIOCARTA | 23    |
| CTCF_PATHWAY          | BIOCARTA | 23    |
| CELLCYCLE_PATHWAY     | BIOCARTA | 23    |
| P53HYPOXIA_PATHWAY    | BIOCARTA | 23    |
| IL12_PATHWAY          | BIOCARTA | 23    |
| GLEEVEC_PATHWAY       | BIOCARTA | 23    |
| INTRINSIC_PATHWAY     | BIOCARTA | 23    |
| MTOR_PATHWAY          | BIOCARTA | 23    |
| IGF1R_PATHWAY         | BIOCARTA | 23    |
| NFKB_PATHWAY          | BIOCARTA | 23    |
| PTDINS_PATHWAY        | BIOCARTA | 23    |
| RAC1_PATHWAY          | BIOCARTA | 23    |
| RAS_PATHWAY           | BIOCARTA | 23    |
| MEF2D_PATHWAY         | BIOCARTA | 23    |
| CSK_PATHWAY           | BIOCARTA | 24    |
| G2_PATHWAY            | BIOCARTA | 24    |
| CXCR4_PATHWAY         | BIOCARTA | 24    |
| ECM_PATHWAY           | BIOCARTA | 24    |
| NTH1_PATHWAY          | BIOCARTA | 24    |
| NOS1_PATHWAY          | BIOCARTA | 24    |
| EIF4_PATHWAY          | BIOCARTA | 24    |
| TPO_PATHWAY           | BIOCARTA | 24    |
| MCALPAIN_PATHWAY      | BIOCARTA | 25    |
| STRESS_PATHWAY        | BIOCARTA | 25    |
| RACCYCD_PATHWAY       | BIOCARTA | 26    |
| BAD_PATHWAY           | BIOCARTA | 26    |
| PGC1A_PATHWAY         | BIOCARTA | 26    |
| WNT_PATHWAY           | BIOCARTA | 26    |

|                                                          |          |    |
|----------------------------------------------------------|----------|----|
| GSK3_PATHWAY                                             | BIOCARTA | 27 |
| EDG1_PATHWAY                                             | BIOCARTA | 27 |
| CREB_PATHWAY                                             | BIOCARTA | 27 |
| G1_PATHWAY                                               | BIOCARTA | 28 |
| ERK_PATHWAY                                              | BIOCARTA | 28 |
| GH_PATHWAY                                               | BIOCARTA | 28 |
| PROTEASOME_PATHWAY                                       | BIOCARTA | 28 |
| INFLAM_PATHWAY                                           | BIOCARTA | 29 |
| VIP_PATHWAY                                              | BIOCARTA | 29 |
| NKT_PATHWAY                                              | BIOCARTA | 29 |
| TNFR1_PATHWAY                                            | BIOCARTA | 29 |
| VEGF_PATHWAY                                             | BIOCARTA | 29 |
| FAS_PATHWAY                                              | BIOCARTA | 30 |
| EGF_PATHWAY                                              | BIOCARTA | 31 |
| PYK2_PATHWAY                                             | BIOCARTA | 31 |
| MYOSIN_PATHWAY                                           | BIOCARTA | 31 |
| HDAC_PATHWAY                                             | BIOCARTA | 32 |
| PDGF_PATHWAY                                             | BIOCARTA | 32 |
| RHO_PATHWAY                                              | BIOCARTA | 32 |
| NO1_PATHWAY                                              | BIOCARTA | 33 |
| DEATH_PATHWAY                                            | BIOCARTA | 33 |
| IL1R_PATHWAY                                             | BIOCARTA | 33 |
| MPR_PATHWAY                                              | BIOCARTA | 34 |
| CARM_ER_PATHWAY                                          | BIOCARTA | 35 |
| AGR_PATHWAY                                              | BIOCARTA | 36 |
| AT1R_PATHWAY                                             | BIOCARTA | 36 |
| ALK_PATHWAY                                              | BIOCARTA | 37 |
| BCR_PATHWAY                                              | BIOCARTA | 37 |
| MET_PATHWAY                                              | BIOCARTA | 37 |
| GPCR_PATHWAY                                             | BIOCARTA | 37 |
| PAR1_PATHWAY                                             | BIOCARTA | 37 |
| TOLL_PATHWAY                                             | BIOCARTA | 37 |
| IL2RB_PATHWAY                                            | BIOCARTA | 38 |
| INTEGRIN_PATHWAY                                         | BIOCARTA | 38 |
| FMLP_PATHWAY                                             | BIOCARTA | 39 |
| P38MAPK_PATHWAY                                          | BIOCARTA | 40 |
| FCER1_PATHWAY                                            | BIOCARTA | 41 |
| CHREBP2_PATHWAY                                          | BIOCARTA | 42 |
| BIOPEPTIDES_PATHWAY                                      | BIOCARTA | 45 |
| KERATINOCYTE_PATHWAY                                     | BIOCARTA | 46 |
| TCR_PATHWAY                                              | BIOCARTA | 49 |
| NFAT_PATHWAY                                             | BIOCARTA | 56 |
| HIVNEF_PATHWAY                                           | BIOCARTA | 58 |
| PPARA_PATHWAY                                            | BIOCARTA | 58 |
| MAPK_PATHWAY                                             | BIOCARTA | 87 |
| PRIMARY_BILE_ACID_BIOSYNTHESIS                           | KEGG     | 16 |
| OTHER_GLYCAN_DEGRADATION                                 | KEGG     | 16 |
| GLYOXYLATE_AND_DICARBOXYLATE_METABOLISM                  | KEGG     | 16 |
| RIBOFLAVIN_METABOLISM                                    | KEGG     | 16 |
| PANTOTHENATE_AND_COA_BIOSYNTHESIS                        | KEGG     | 16 |
| STEROID_BIOSYNTHESIS                                     | KEGG     | 17 |
| ONE_CARBON_POOL_BY_FOLATE                                | KEGG     | 17 |
| RENIN_ANGIOTENSIN_SYSTEM                                 | KEGG     | 17 |
| PHENYLALANINE_METABOLISM                                 | KEGG     | 18 |
| ALPHA_LINOLENIC_ACID_METABOLISM                          | KEGG     | 19 |
| GLYCOSAMINOGLYCAN_DEGRADATION                            | KEGG     | 21 |
| BETA_ALANINE_METABOLISM                                  | KEGG     | 22 |
| GLYCOSAMINOGLYCAN_BIOSYNTHESIS_CHONDROITIN_SULFATE       | KEGG     | 22 |
| BIOSYNTHESIS_OF_UNSATURATED_FATTY_ACIDS                  | KEGG     | 22 |
| NITROGEN_METABOLISM                                      | KEGG     | 23 |
| MISMATCH_REPAIR                                          | KEGG     | 23 |
| PROXIMAL_TUBULE_BICARBONATE_RECLAMATION                  | KEGG     | 23 |
| NICOTINATE_AND_NICOTINAMIDE_METABOLISM                   | KEGG     | 24 |
| PROTEIN_EXPORT                                           | KEGG     | 24 |
| ASCORBATE_AND_ALDARATE_METABOLISM                        | KEGG     | 25 |
| GLYCOSYLPHOSPHATIDYLINOSITOL_GPI_ANCHOR_BIOSYNTHESIS     | KEGG     | 25 |
| DORSO_VENTRAL_AXIS_FORMATION                             | KEGG     | 25 |
| MATURITY_ONSET_DIABETES_OF_THE_YOUNG                     | KEGG     | 25 |
| GALACTOSE_METABOLISM                                     | KEGG     | 26 |
| SELENOAMINO_ACID_METABOLISM                              | KEGG     | 26 |
| GLYCOSAMINOGLYCAN_BIOSYNTHESIS_HEPARAN_SULFATE           | KEGG     | 26 |
| GLYCOSPHINGOLIPID_BIOSYNTHESIS_LACTO_AND_NEOLACTO_SERIES | KEGG     | 26 |
| PENTOSE_PHOSPHATE_PATHWAY                                | KEGG     | 27 |
| PENTOSE_AND_GLUCURONATE_INTERCONVERSIONS                 | KEGG     | 28 |
| HOMOLOGOUS_RECOMBINATION                                 | KEGG     | 28 |
| HISTIDINE_METABOLISM                                     | KEGG     | 29 |
| LINOLEIC_ACID_METABOLISM                                 | KEGG     | 29 |
| RNA_POLYMERASE                                           | KEGG     | 29 |
| THYROID_CANCER                                           | KEGG     | 29 |
| O_GLYCAN_BIOSYNTHESIS                                    | KEGG     | 30 |
| ASTHMA                                                   | KEGG     | 30 |
| GLYCINE_SERINE_AND_THREONINE_METABOLISM                  | KEGG     | 31 |
| CITRATE_CYCLE_TCA_CYCLE                                  | KEGG     | 32 |
| ALANINE_ASPARTATE_AND_GLUTAMATE_METABOLISM               | KEGG     | 32 |
| ETHER_LIPID_METABOLISM                                   | KEGG     | 33 |
| PROPANOATE_METABOLISM                                    | KEGG     | 33 |
| FRUCTOSE_AND_MANNOSE_METABOLISM                          | KEGG     | 34 |
| CYSTEINE_AND_METHIONINE_METABOLISM                       | KEGG     | 34 |
| BUTANOATE_METABOLISM                                     | KEGG     | 34 |
| BASE_EXCISION_REPAIR                                     | KEGG     | 35 |
| REGULATION_OF_AUTOPHAGY                                  | KEGG     | 35 |
| PRION_DISEASES                                           | KEGG     | 35 |
| PRIMARY_IMMUNODEFICIENCY                                 | KEGG     | 35 |
| BASAL_TRANSCRIPTION_FACTORS                              | KEGG     | 36 |
| DNA_REPLICATION                                          | KEGG     | 36 |
| SNARE_INTERACTIONS_IN_VESICULAR_TRANSPORT                | KEGG     | 38 |
| ALLOGRAFT_REJECTION                                      | KEGG     | 38 |
| TRYPTOPHAN_METABOLISM                                    | KEGG     | 40 |
| SPHINGOLIPID_METABOLISM                                  | KEGG     | 40 |
| PYRUVATE_METABOLISM                                      | KEGG     | 40 |
| PORPHYRIN_AND_CHLOROPHYLL_METABOLISM                     | KEGG     | 41 |

|                                                            |      |     |
|------------------------------------------------------------|------|-----|
| AMINOACYL_TRNA_BIOSYNTHESIS                                | KEGG | 41  |
| FATTY_ACID_METABOLISM                                      | KEGG | 42  |
| TYROSINE_METABOLISM                                        | KEGG | 42  |
| ALDOSTERONE_REGULATED_SODIUM_REABSORPTION                  | KEGG | 42  |
| BLADDER_CANCER                                             | KEGG | 42  |
| GRAFT_VERSUS_HOST_DISEASE                                  | KEGG | 42  |
| VALINE_LEUCINE_AND_ISOLEUCINE_DEGRADATION                  | KEGG | 44  |
| LYSINE_DEGRADATION                                         | KEGG | 44  |
| AMINO_SUGAR_AND_NUCLEOTIDE_SUGAR_METABOLISM                | KEGG | 44  |
| ABC_TRANSPORTERS                                           | KEGG | 44  |
| NUCLEOTIDE_EXCISION_REPAIR                                 | KEGG | 44  |
| TYPE_I_DIABETES_MELLITUS                                   | KEGG | 44  |
| VASOPRESSIN_REGULATED_WATER_REABSORPTION                   | KEGG | 44  |
| N_GLYCAN_BIOSYNTHESIS                                      | KEGG | 46  |
| NOTCH_SIGNALING_PATHWAY                                    | KEGG | 47  |
| TYPE_II_DIABETES_MELLITUS                                  | KEGG | 47  |
| PROTEASOME                                                 | KEGG | 48  |
| INTESTINAL_IMMUNE_NETWORK_FOR_IGA_PRODUCTION               | KEGG | 48  |
| GLYCEROLIPID_METABOLISM                                    | KEGG | 49  |
| GLUTATHIONE_METABOLISM                                     | KEGG | 50  |
| DRUG_METABOLISM_OTHER_ENZYMES                              | KEGG | 51  |
| STARCH_AND_SUCROSE_METABOLISM                              | KEGG | 52  |
| MTOR_SIGNALING_PATHWAY                                     | KEGG | 52  |
| TASTE_TRANSDUCTION                                         | KEGG | 52  |
| ENDOMETRIAL_CANCER                                         | KEGG | 52  |
| AMYOTROPHIC_LATERAL_SCLEROSIS_ALS                          | KEGG | 53  |
| AUTOIMMUNE_THYROID_DISEASE                                 | KEGG | 53  |
| ARGININE_AND_PROLINE_METABOLISM                            | KEGG | 54  |
| INOSITOL_PHOSPHATE_METABOLISM                              | KEGG | 54  |
| NON_SMALL_CELL_LUNG_CANCER                                 | KEGG | 54  |
| STEROID_HORMONE_BIOSYNTHESIS                               | KEGG | 55  |
| BASAL_CELL_CARCINOMA                                       | KEGG | 55  |
| HEDGEHOG_SIGNALING_PATHWAY                                 | KEGG | 56  |
| CYTOSOLIC_DNA_SENSING_PATHWAY                              | KEGG | 56  |
| VIBRIO_CHOLERAE_INFECTION                                  | KEGG | 56  |
| ARACHIDONIC_ACID_METABOLISM                                | KEGG | 58  |
| RNA_DEGRADATION                                            | KEGG | 59  |
| PATHOGENIC_ESCHERICHIA_COLI_INFECTION                      | KEGG | 59  |
| ACUTE_MYELOID_LEUKEMIA                                     | KEGG | 60  |
| GLYCOLYSIS_GLUCCONEOGENESIS                                | KEGG | 62  |
| NOD_LIKE_RECEPTOR_SIGNALING_PATHWAY                        | KEGG | 62  |
| COLORRECTAL_CANCER                                         | KEGG | 62  |
| RETINOL_METABOLISM                                         | KEGG | 64  |
| GLIOMA                                                     | KEGG | 65  |
| ADIPOCYTOKINE_SIGNALING_PATHWAY                            | KEGG | 67  |
| EPITHELIAL_CELL_SIGNALING_IN_HELICOBACTER_PYLORI_INFECTION | KEGG | 68  |
| PPAR_SIGNALING_PATHWAY                                     | KEGG | 69  |
| P53_SIGNALING_PATHWAY                                      | KEGG | 69  |
| COMPLEMENT_AND_COAGULATION_CASCADES                        | KEGG | 69  |
| METABOLISM_OF_XENOBIOTICS_BY_CYTOCHROME_P450               | KEGG | 70  |
| LONG_TERM_POTENTIATION                                     | KEGG | 70  |
| LONG_TERM_DEPRESSION                                       | KEGG | 70  |
| RENAL_CELL_CARCINOMA                                       | KEGG | 70  |
| PANCREATIC_CANCER                                          | KEGG | 70  |
| RIG_I_LIKE_RECEPTOR_SIGNALING_PATHWAY                      | KEGG | 71  |
| MELANOMA                                                   | KEGG | 71  |
| DRUG_METABOLISM_CYTOCHROME_P450                            | KEGG | 72  |
| LEISHMANIA_INFECTION                                       | KEGG | 72  |
| CHRONIC_MYELOID_LEUKEMIA                                   | KEGG | 73  |
| VIRAL_MYOCARDITIS                                          | KEGG | 73  |
| ADHERENS_JUNCTION                                          | KEGG | 75  |
| B_CELL_RECEPTOR_SIGNALING_PATHWAY                          | KEGG | 75  |
| PHOSPHATIDYLINOSITOL_SIGNALING_SYSTEM                      | KEGG | 76  |
| VEGF_SIGNALING_PATHWAY                                     | KEGG | 76  |
| ARRHYTHMOGENIC_RIGHT_VENTRICULAR_CARDIOMYOPATHY_ARVC       | KEGG | 76  |
| GLYCEROPHOSPHOLIPID_METABOLISM                             | KEGG | 77  |
| PEROXISOME                                                 | KEGG | 78  |
| FC_EPSILON_R1_SIGNALING_PATHWAY                            | KEGG | 79  |
| CARDIAC_MUSCLE_CONTRACTION                                 | KEGG | 80  |
| ECM_RECEPTOR_INTERACTION                                   | KEGG | 84  |
| SMALL_CELL_LUNG_CANCER                                     | KEGG | 84  |
| HYPERTROPHIC_CARDIOMYOPATHY_HCM                            | KEGG | 85  |
| TGF_BETA_SIGNALING_PATHWAY                                 | KEGG | 86  |
| PROGESTERONE_MEDIATED_OOCYTE_MATURATION                    | KEGG | 86  |
| ERBB_SIGNALING_PATHWAY                                     | KEGG | 87  |
| RIBOSOME                                                   | KEGG | 88  |
| APOPTOSIS                                                  | KEGG | 88  |
| HEMATOPOIETIC_CELL_LINEAGE                                 | KEGG | 88  |
| ANTIGEN_PROCESSING_AND_PRESENTATION                        | KEGG | 89  |
| PROSTATE_CANCER                                            | KEGG | 89  |
| GAP_JUNCTION                                               | KEGG | 90  |
| DILATED_CARDIOMYOPATHY                                     | KEGG | 92  |
| FC_GAMMA_R_MEDIATED_PHAGOCYTOSIS                           | KEGG | 97  |
| PYRIMIDINE_METABOLISM                                      | KEGG | 98  |
| GNRH_SIGNALING_PATHWAY                                     | KEGG | 101 |
| TOLL_LIKE_RECEPTOR_SIGNALING_PATHWAY                       | KEGG | 102 |
| MELANOGENESIS                                              | KEGG | 102 |
| T_CELL_RECEPTOR_SIGNALING_PATHWAY                          | KEGG | 108 |
| OOCYTE_MEIOSIS                                             | KEGG | 114 |
| VASCULAR_SMOOTH_MUSCLE_CONTRACTION                         | KEGG | 115 |
| LEUKOCYTE_TRANSENDOTHELIAL_MIGRATION                       | KEGG | 118 |
| LYSOSOME                                                   | KEGG | 121 |
| NEUROTROPIN_SIGNALING_PATHWAY                              | KEGG | 126 |
| SPLICEOSOME                                                | KEGG | 128 |
| CELL_CYCLE                                                 | KEGG | 128 |
| AXON_GUIDANCE                                              | KEGG | 129 |
| PARKINSONS_DISEASE                                         | KEGG | 133 |
| CELL_ADHESION_MOLECULES_CAMS                               | KEGG | 134 |
| TIGHT_JUNCTION                                             | KEGG | 134 |
| OXIDATIVE_PHOSPHORYLATION                                  | KEGG | 135 |
| NATURAL_KILLER_CELL_MEDIATED_CYTOTOXICITY                  | KEGG | 137 |

|                                                                                                             |          |     |
|-------------------------------------------------------------------------------------------------------------|----------|-----|
| INSULIN_SIGNALING_PATHWAY                                                                                   | KEGG     | 137 |
| UBIQUITIN_MEDIATED_PROTEOLYSIS                                                                              | KEGG     | 138 |
| SYSTEMIC_LUPUS_ERYTHEMATOSUS                                                                                | KEGG     | 140 |
| WNT_SIGNALING_PATHWAY                                                                                       | KEGG     | 151 |
| JAK_STAT_SIGNALING_PATHWAY                                                                                  | KEGG     | 155 |
| PURINE_METABOLISM                                                                                           | KEGG     | 159 |
| ALZHEIMERS_DISEASE                                                                                          | KEGG     | 169 |
| CALCIUM_SIGNALING_PATHWAY                                                                                   | KEGG     | 178 |
| ENDOCYTOSIS                                                                                                 | KEGG     | 183 |
| HUNTINGTONS_DISEASE                                                                                         | KEGG     | 185 |
| CHEMOKINE_SIGNALING_PATHWAY                                                                                 | KEGG     | 190 |
| FOCAL_ADHESION                                                                                              | KEGG     | 201 |
| REGULATION_OF_ACTIN_CYTOSKELETON                                                                            | KEGG     | 216 |
| MAPK_SIGNALING_PATHWAY                                                                                      | KEGG     | 267 |
| CYTOKINE_CYTOKINE_RECEPTOR_INTERACTION                                                                      | KEGG     | 267 |
| NEUROACTIVE_LIGAND_RECEPTOR_INTERACTION                                                                     | KEGG     | 272 |
| CTNNB1_PHOSPHORYLATION_CASCADE                                                                              | REACTOME | 16  |
| PRE_NOTCH_PROCESSING_IN_GOLGI                                                                               | REACTOME | 16  |
| TGF_BETA_RECEPTOR_SIGNALING_IN_EMT_EPITHELIAL_TO_MESENCHYMAL_TRANSITION                                     | REACTOME | 16  |
| ACTIVATED_POINT_MUTANTS_OF_FGFR2                                                                            | REACTOME | 16  |
| ACYL_CHAIN_REMODELLING_OF_PG                                                                                | REACTOME | 16  |
| PHOSPHORYLATION_OF_CD3_AND_TCR_ZETA_CHAINS                                                                  | REACTOME | 16  |
| XENOBIOTICS                                                                                                 | REACTOME | 16  |
| REGULATION_OF_INSULIN_LIKE_GROWTH_FACTOR_IGF_ACTIVITY_BY_INSULIN_LIKE_GROWTH_FACTOR_BINDING_PROTEINS_IGFBPS | REACTOME | 16  |
| ACETYLCHOLINE_BINDING_AND_DOWNSTREAM_EVENTS                                                                 | REACTOME | 16  |
| NUCLEOTIDE_LIKE_PURINERGIC_RECEPTORS                                                                        | REACTOME | 16  |
| EICOSANOID_LIGAND_BINDING_RECEPTORS                                                                         | REACTOME | 16  |
| TRAFFICKING_OF_GLR2_CONTAINING_AMPA_RECEPTORS                                                               | REACTOME | 16  |
| SYNTHESIS_SECRETION_AND_DEACYLATION_OF_GHRELIN                                                              | REACTOME | 16  |
| JNK_C_JUN_KINASES_PHOSPHORYLATION_AND_ACTIVATION_MEDIATED_BY_ACTIVATED_HUMAN_TAK1                           | REACTOME | 16  |
| PLATELET_SENSITIZATION_BY_LDL                                                                               | REACTOME | 16  |
| FORMATION_OF_ATP_BY_CHEMIOSMOTIC_COUPLING                                                                   | REACTOME | 16  |
| CHYLOMICRON_MEDIATED_LIPID_TRANSPORT                                                                        | REACTOME | 16  |
| INTEGRATION_OF_PROVIRUS                                                                                     | REACTOME | 16  |
| INITIAL_TRIGGERING_OF_COMPLEMENT                                                                            | REACTOME | 16  |
| REGULATION_OF_KIT_SIGNALING                                                                                 | REACTOME | 17  |
| PROTEOLYTIC_CLEAVAGE_OF_SNARE_COMPLEX_PROTEINS                                                              | REACTOME | 17  |
| RESOLUTION_OF_AP_SITES_VIA_THE_MULTIPLE_NUCLEOTIDE_PATCH_REPLACEMENT_PATHWAY                                | REACTOME | 17  |
| ARMS_MEDIATED_ACTIVATION                                                                                    | REACTOME | 17  |
| SYNTHESIS_OF_PIPS_AT_THE_GOLGI_MEMBRANE                                                                     | REACTOME | 17  |
| TIE2_SIGNALING                                                                                              | REACTOME | 17  |
| HOMOLOGOUS_RECOMBINATION_REPAIR_OF_REPLICATION_INDEPENDENT_DOUBLE_STRAND_BREAKS                             | REACTOME | 17  |
| BRANCHED_CHAIN_AMINO_ACID_CATABOLISM                                                                        | REACTOME | 17  |
| NA_CL_DEPENDENT_NEUROTRANSMITTER_TRANSPORTERS                                                               | REACTOME | 17  |
| RAS_ACTIVATION_UOPN_CA2_INFUX_THROUGH_NMDA_RECEPTOR                                                         | REACTOME | 17  |
| AMINO_ACID_SYNTHESIS_AND_INTERCONVERSION_TRANSAMINATION                                                     | REACTOME | 17  |
| RAP1_SIGNALING                                                                                              | REACTOME | 17  |
| GABA_SYNTHESIS_RELEASE_REUPTAKE_AND_DEGRADATION                                                             | REACTOME | 17  |
| DESTABILIZATION_OF_MRNA_BY_BRF1                                                                             | REACTOME | 17  |
| DESTABILIZATION_OF_MRNA_BY_KSRP                                                                             | REACTOME | 17  |
| DESTABILIZATION_OF_MRNA_BY_TRISTETRAPROLIN_TTP                                                              | REACTOME | 17  |
| INTRINSIC_PATHWAY                                                                                           | REACTOME | 17  |
| ACTIVATION_OF_BH3_ONLY_PROTEINS                                                                             | REACTOME | 17  |
| RNA_POL_III_CHAIN_ELONGATION                                                                                | REACTOME | 17  |
| INFLAMMASOMES                                                                                               | REACTOME | 17  |
| SYNTHESIS_OF_GLYCOSYLPHOSPHATIDYLINOSITOL_GPI                                                               | REACTOME | 17  |
| SHC_RELATED_EVENTS                                                                                          | REACTOME | 17  |
| GLYCOGEN_BREAKDOWN_GLYCOGENOLYSIS                                                                           | REACTOME | 18  |
| SIGNALING_BY_NODAL                                                                                          | REACTOME | 18  |
| ABCA_TRANSPORTERS_IN_LIPID_HOMEOSTASIS                                                                      | REACTOME | 18  |
| SIGNALING_BY_CONSTITUTIVELY_ACTIVE_EGFR                                                                     | REACTOME | 18  |
| RIP_MEDIATED_NFKB_ACTIVATION_VIA_DAI                                                                        | REACTOME | 18  |
| OXYGEN_DEPENDENT_PROLINE_HYDROXYLATION_OF_HYPOXIA_INDUCIBLE_FACTOR_ALPHA                                    | REACTOME | 18  |
| SYNTHESIS_OF_PC                                                                                             | REACTOME | 18  |
| FATTY_ACYL_COA_BIOSYNTHESIS                                                                                 | REACTOME | 18  |
| PKA_MEDIATED_PHOSPHORYLATION_OF_CREB                                                                        | REACTOME | 18  |
| PD1_SIGNALING                                                                                               | REACTOME | 18  |
| ENERGY_DEPENDENT_REGULATION_OF_MTOR_BY_LKB1_AMPK                                                            | REACTOME | 18  |
| ACTIVATED_TAK1_MEDIATES_P38_MAPK_ACTIVATION                                                                 | REACTOME | 18  |
| REGULATION_OF_SIGNALING_BY_CBL                                                                              | REACTOME | 18  |
| PLATELET_CALCIIUM_HOMEOSTASIS                                                                               | REACTOME | 18  |
| N_GLYCAN_ANTENNAE_ELONGATION_IN_THE_MEDIAL_TRANS_GOLGI                                                      | REACTOME | 18  |
| GLUCURONIDATION                                                                                             | REACTOME | 18  |
| GAP_JUNCTION_ASSEMBLY                                                                                       | REACTOME | 18  |
| BASE_EXCISION_REPAIR                                                                                        | REACTOME | 19  |
| SYNTHESIS_OF_BILE_ACIDS_AND_BILE_SALTS                                                                      | REACTOME | 19  |
| ACTIVATED_AMPK_STIMULATES_FATTY_ACID_OXIDATION_IN_MUSCLE                                                    | REACTOME | 19  |
| BOTULINUM_NEUROTOXICITY                                                                                     | REACTOME | 19  |
| PROLONGED_ERK_ACTIVATION_EVENTS                                                                             | REACTOME | 19  |
| SIGNALING_BY_FGFR1_FUSION_MUTANTS                                                                           | REACTOME | 19  |
| POST_CHAPERONIN_TUBULIN_FOLDING_PATHWAY                                                                     | REACTOME | 19  |
| PYRUVATE_METABOLISM                                                                                         | REACTOME | 19  |
| SYNTHESIS_AND_INTERCONVERSION_OF_NUCLEOTIDE_DI_AND_TRIPHOSPHATES                                            | REACTOME | 19  |
| CGMP_EFFECTS                                                                                                | REACTOME | 19  |
| PROSTACYCLIN_SIGNALING_THROUGH_PROSTACYCLIN_RECEPTOR                                                        | REACTOME | 19  |
| SYNTHESIS_SECRETION_AND_INACTIVATION_OF_GLP1                                                                | REACTOME | 19  |
| LAGGING_STRAND_SYNTHESIS                                                                                    | REACTOME | 19  |
| RNA_POL_III_TRANSCRIPTION_TERMINATION                                                                       | REACTOME | 19  |
| G1_S_SPECIFIC_TRANSCRIPTION                                                                                 | REACTOME | 19  |
| SHC1_EVENTS_IN_ERBB4_SIGNALING                                                                              | REACTOME | 20  |
| HS_GAG_DEGRADATION                                                                                          | REACTOME | 20  |
| DOWNREGULATION_OF_SMAD2_3_SMAD4_TRANSCRIPTIONAL_ACTIVITY                                                    | REACTOME | 20  |
| ENOS_ACTIVATION_AND_REGULATION                                                                              | REACTOME | 20  |
| REGULATION_OF_GENE_EXPRESSION_IN_BETA_CELLS                                                                 | REACTOME | 20  |
| G_BETA_GAMMA_SIGNALING_THROUGH_PLG_BETA                                                                     | REACTOME | 20  |
| NEPHRIN_INTERACTIONS                                                                                        | REACTOME | 20  |
| NEF_MEDIATES_DOWN_MODULATION_OF_CELL_SURFACE_RECEPTORS_BY_RECRUITING_THEM_TO_CLATHRIN_ADAPTERS              | REACTOME | 21  |
| CHONDROITIN_SULFATE_BIOSYNTHESIS                                                                            | REACTOME | 21  |
| ACYL_CHAIN_REMODELLING_OF_PE                                                                                | REACTOME | 21  |
| ERK_MAPK_TARGETS                                                                                            | REACTOME | 21  |
| MITOCHONDRIAL_TRNA_AMINOACYLATION                                                                           | REACTOME | 21  |

|                                                                                                                             |          |    |
|-----------------------------------------------------------------------------------------------------------------------------|----------|----|
| INSULIN_SYNTHESIS_AND_PROCESSING                                                                                            | REACTOME | 21 |
| PEROXISOMAL_LIPID_METABOLISM                                                                                                | REACTOME | 21 |
| CTLA4_INHIBITORY_SIGNALING                                                                                                  | REACTOME | 21 |
| ADP_SIGNALING_THROUGH_P2RY12                                                                                                | REACTOME | 21 |
| TRAF6_MEDIATED_NFKB_ACTIVATION                                                                                              | REACTOME | 21 |
| LIGAND_GATED_ION_CHANNEL_TRANSPORT                                                                                          | REACTOME | 21 |
| EARLY_PHASE_OF_HIV_LIFE_CYCLE                                                                                               | REACTOME | 21 |
| ANTIGEN_PRESENTATION_FOLDING_ASSEMBLY_AND_PEPTIDE_LOADING_OF_CLASS_I_MHC                                                    | REACTOME | 21 |
| RNA_POL_I_TRANSCRIPTION_TERMINATION                                                                                         | REACTOME | 22 |
| GRB2_EVENTS_IN_ERBB2_SIGNALING                                                                                              | REACTOME | 22 |
| SIGNALING_BY_HIPPO                                                                                                          | REACTOME | 22 |
| ACYL_CHAIN_REMODELLING_OF_PC                                                                                                | REACTOME | 22 |
| FORMATION_OF_TUBULIN_FOLDING_INTERMEDIATES_BY_CCT_TRIC                                                                      | REACTOME | 22 |
| CD28_DEPENDENT_PI3K_AKT_SIGNALING                                                                                           | REACTOME | 22 |
| DEADENYLATION_OF_MRNA                                                                                                       | REACTOME | 22 |
| METAL_ION_SLC_TRANSPORTERS                                                                                                  | REACTOME | 22 |
| INCRETIN_SYNTHESIS_SECRETION_AND_INACTIVATION                                                                               | REACTOME | 22 |
| CONVERSION_FROM_APC_C_CD20_TO_APC_C_CDH1_IN_LATE_ANAPHASE                                                                   | REACTOME | 22 |
| FGFR_LIGAND_BINDING_AND_ACTIVATION                                                                                          | REACTOME | 22 |
| RNA_POL_III_TRANSCRIPTION_INITIATION_FROM_TYPE_2_PROMOTER                                                                   | REACTOME | 23 |
| INSULIN_RECEPTOR_RECYCLING                                                                                                  | REACTOME | 23 |
| CIRCADIAN_REPRESSION_OF_EXPRESSION_BY_REV_ERBA                                                                              | REACTOME | 23 |
| SIGNALING_BY_BMP                                                                                                            | REACTOME | 23 |
| DOWNREGULATION_OF_TGF_BETA_RECEPTOR_SIGNALING                                                                               | REACTOME | 23 |
| MICRORNA_MIRNA_BIOGENESIS                                                                                                   | REACTOME | 23 |
| PROCESSING_OF_CAPPED_INTRONLESS_PRE_MRNA                                                                                    | REACTOME | 23 |
| LYSOSOME_VESICLE_BIOGENESIS                                                                                                 | REACTOME | 23 |
| THROMBOXANE_SIGNALING_THROUGH_TP_RECEPTOR                                                                                   | REACTOME | 23 |
| TAK1_ACTIVATES_NFKB_BY_PHOSPHORYLATION_AND_ACTIVATION_OF_IKKS_COMPLEX                                                       | REACTOME | 23 |
| INTERACTION_BETWEEN_L1_AND_ANKYRINS                                                                                         | REACTOME | 23 |
| FORMATION_OF_INCISION_COMPLEX_IN_GG_NER                                                                                     | REACTOME | 23 |
| ABORTIVE_ELONGATION_OF_HIV1_TRANSCRIPT_IN_THE_ABSENCE_OF_TAT                                                                | REACTOME | 23 |
| PHOSPHORYLATION_OF_THE_APC_C                                                                                                | REACTOME | 23 |
| GLUTATHIONE_CONJUGATION                                                                                                     | REACTOME | 23 |
| INHIBITION_OF_THE_PROTEOLYTIC_ACTIVITY_OF_APC_C_REQUIRED_FOR_THE_ONSET_OF_ANAPHASE_BY_MITOTIC_SPINDLE_CHECKPOINT_COMPONENTS | REACTOME | 24 |
| GROWTH_HORMONE_RECEPTOR_SIGNALING                                                                                           | REACTOME | 24 |
| SULFUR_AMINO_ACID_METABOLISM                                                                                                | REACTOME | 24 |
| TERMINATION_OF_O_GLYCAN_BIOSYNTHESIS                                                                                        | REACTOME | 24 |
| RORA_ACTIVATES_CIRCADIAN_EXPRESSION                                                                                         | REACTOME | 24 |
| YAP1_AND_WWTR1_TAZ_STIMULATED_GENE_EXPRESSION                                                                               | REACTOME | 24 |
| NUCLEAR_EVENTS_KINASE_AND_TRANSCRIPTION_FACTOR_ACTIVATION                                                                   | REACTOME | 24 |
| CYTOSOLIC_TRNA_AMINOACYLATION                                                                                               | REACTOME | 24 |
| DOUBLE_STRAND_BREAK_REPAIR                                                                                                  | REACTOME | 24 |
| KINESINS                                                                                                                    | REACTOME | 24 |
| REGULATION_OF_IFNA_SIGNALING                                                                                                | REACTOME | 24 |
| CHOLESTEROL_BIOSYNTHESIS                                                                                                    | REACTOME | 24 |
| PYRIMIDINE_METABOLISM                                                                                                       | REACTOME | 24 |
| G0_AND_EARLY_G1                                                                                                             | REACTOME | 25 |
| REGULATION_OF_HYPOXIA_INDUCIBLE_FACTOR_HIF_BY_OXYGEN                                                                        | REACTOME | 25 |
| A_TETRASACCHARIDE_LINKER_SEQUENCE_IS_REQUIRED_FOR_GAG_SYNTHESIS                                                             | REACTOME | 25 |
| EGFR_DOWNREGULATION                                                                                                         | REACTOME | 25 |
| DARPP_32_EVENTS                                                                                                             | REACTOME | 25 |
| INHIBITION_OF_INSULIN_SECRETION_BY_ADRENALINE_NORADRENALINE                                                                 | REACTOME | 25 |
| FANCONI_ANEMIA_PATHWAY                                                                                                      | REACTOME | 25 |
| ADP_SIGNALING_THROUGH_P2RY1                                                                                                 | REACTOME | 25 |
| G_BETA_GAMMA_SIGNALING_THROUGH_PI3KGAMMA                                                                                    | REACTOME | 25 |
| SMOOTH_MUSCLE_CONTRACTION                                                                                                   | REACTOME | 25 |
| EFFECTS_OF_PIP2_HYDROLYSIS                                                                                                  | REACTOME | 25 |
| NITRIC_OXIDE_STIMULATES_GUANYLATE_CYCLASE                                                                                   | REACTOME | 25 |
| INHIBITION_OF_VOLTAGE_GATED_CA2_CHANNELS_VIA_GBETA_GAMMA_SUBUNITS                                                           | REACTOME | 25 |
| TRANSFERRIN_ENDOCYTOSIS_AND_RECYCLING                                                                                       | REACTOME | 25 |
| RNA_POL_I_TRANSCRIPTION_INITIATION                                                                                          | REACTOME | 25 |
| TGF_BETA_RECEPTOR_SIGNALING_ACTIVATES_SMADS                                                                                 | REACTOME | 26 |
| KERATAN_SULFATE_BIOSYNTHESIS                                                                                                | REACTOME | 26 |
| REGULATORY_RNA_PATHWAYS                                                                                                     | REACTOME | 26 |
| CITRIC_ACID_CYCLE_TCA_CYCLE                                                                                                 | REACTOME | 26 |
| ACTIVATION_OF_GENES_BY_ATF4                                                                                                 | REACTOME | 26 |
| POST_TRANSLATIONAL_MODIFICATION_SYNTHESIS_OF_GPI_ANCHORED_PROTEINS                                                          | REACTOME | 26 |
| RNA_POL_III_TRANSCRIPTION_INITIATION_FROM_TYPE_3_PROMOTER                                                                   | REACTOME | 26 |
| APC_C_CD20_MEDIATED_DEGRADATION_OF_CYCLIN_B                                                                                 | REACTOME | 26 |
| PTM_GAMMA_CARBOXYLATION_HYPUSINE_FORMATION_AND_ARYLSULFATASE_ACTIVATION                                                     | REACTOME | 27 |
| BILE_ACID_AND_BILE_SALT_METABOLISM                                                                                          | REACTOME | 27 |
| ACTIVATED_NOTCH1_TRANSMITS_SIGNAL_TO_THE_NUCLEUS                                                                            | REACTOME | 27 |
| SIGNALING_TO_RAS                                                                                                            | REACTOME | 27 |
| SMAD2_SMAD3_SMAD4_HETEROTRIMER_REGULATES_TRANSCRIPTION                                                                      | REACTOME | 27 |
| SYNTHESIS_OF_PA                                                                                                             | REACTOME | 27 |
| GENERATION_OF_SECOND_MESSENGER_MOLECULES                                                                                    | REACTOME | 27 |
| G_PROTEIN_ACTIVATION                                                                                                        | REACTOME | 27 |
| INTEGRIN_ALPHAIIIB_BETA3_SIGNALING                                                                                          | REACTOME | 27 |
| ASSOCIATION_OF_TRIC_CCT_WITH_TARGET_PROTEINS_DURING_BIOSYNTHESIS                                                            | REACTOME | 27 |
| STRIATED_MUSCLE_CONTRACTION                                                                                                 | REACTOME | 27 |
| ADHERENS_JUNCTIONS_INTERACTIONS                                                                                             | REACTOME | 27 |
| SEMA4D_INDUCED_CELL_MIGRATION_AND_GROWTH_CONE_COLLAPSE                                                                      | REACTOME | 27 |
| CREB_PHOSPHORYLATION_THROUGH_THE_ACTIVATION_OF_RAS                                                                          | REACTOME | 27 |
| AMINE_COMPOUND_SLC_TRANSPORTERS                                                                                             | REACTOME | 27 |
| RECYCLING_PATHWAY_OF_L1                                                                                                     | REACTOME | 27 |
| IL_RECEPTOR_SHC_SIGNALING                                                                                                   | REACTOME | 27 |
| ENDOSOMAL_SORTING_COMPLEX_REQUIRED_FOR_TRANSPORT_ESCRT                                                                      | REACTOME | 27 |
| NEP_NS2_INTERACTS_WITH_THE_CELLULAR_EXPORT_MACHINERY                                                                        | REACTOME | 27 |
| TRANSPORT_OF_RIBONUCLEOPROTEINS_INTO_THE_HOST_NUCLEUS                                                                       | REACTOME | 27 |
| REGULATION_OF_GLUKOKINASE_BY_GLUKOKINASE_REGULATORY_PROTEIN                                                                 | REACTOME | 27 |
| EXTENSION_OF_TELOMERES                                                                                                      | REACTOME | 27 |
| GAP_JUNCTION_TRAFFICKING                                                                                                    | REACTOME | 27 |
| PREFOLDIN_MEDIATED_TRANSFER_OF_SUBSTRATE_TO_CCT_TRIC                                                                        | REACTOME | 28 |
| TRAFFICKING_OF_AMPA_RECEPTORS                                                                                               | REACTOME | 28 |
| G_PROTEIN_BETA_GAMMA_SIGNALING                                                                                              | REACTOME | 28 |
| MYOGENESIS                                                                                                                  | REACTOME | 28 |
| SHC_MEDIATED_CASCADE                                                                                                        | REACTOME | 28 |
| LIPOPROTEIN_METABOLISM                                                                                                      | REACTOME | 28 |
| THE_ROLE_OF_NEF_IN_HIV1_REPLICATION_AND_DISEASE_PATHOGENESIS                                                                | REACTOME | 28 |
| APC_CD20_MEDIATED_DEGRADATION_OF_NEK2A                                                                                      | REACTOME | 28 |

|                                                                                                                    |          |    |
|--------------------------------------------------------------------------------------------------------------------|----------|----|
| PRE_NOTCH_TRANSCRIPTION_AND_TRANSLATION                                                                            | REACTOME | 29 |
| DEGRADATION_OF_THE_EXTRACELLULAR_MATRIX                                                                            | REACTOME | 29 |
| ANTIGEN_ACTIVATES_B_CELL_RECEPTOR_LEADING_TO_GENERATION_OF_SECOND_MESSENGERS                                       | REACTOME | 29 |
| GLYCOLYSIS                                                                                                         | REACTOME | 29 |
| STEROID_HORMONES                                                                                                   | REACTOME | 29 |
| PERK_REGULATED_GENE_EXPRESSION                                                                                     | REACTOME | 29 |
| TIGHT_JUNCTION_INTERACTIONS                                                                                        | REACTOME | 29 |
| BIOSYNTHESIS_OF_THE_N_GLYCAN_PRECURSOR_DOLICHOL_LIPID_LINKED_OLIGOSACCHARIDE_LLO_AND_TRANSFER_TO_A_NASCENT_PROTEIN | REACTOME | 29 |
| PKB_MEDIATED_EVENTS                                                                                                | REACTOME | 29 |
| PIP3_ACTIVATES_AKT_SIGNALING                                                                                       | REACTOME | 29 |
| SIGNALING_BY_FGFR1_MUTANTS                                                                                         | REACTOME | 30 |
| KERATAN_SULFATE_KERATIN_METABOLISM                                                                                 | REACTOME | 30 |
| BASIGIN_INTERACTIONS                                                                                               | REACTOME | 30 |
| REGULATION_OF_BETA_CELL_DEVELOPMENT                                                                                | REACTOME | 30 |
| MRNA_CAPPING                                                                                                       | REACTOME | 30 |
| CA_DEPENDENT_EVENTS                                                                                                | REACTOME | 30 |
| SIGNALING_BY_ROBO_RECEPTOR                                                                                         | REACTOME | 30 |
| FORMATION_OF_TRANSCRIPTION_COUPLED_NER_TC_NER_REPAIR_COMPLEX                                                       | REACTOME | 30 |
| MAPK_TARGETS_NUCLEAR_EVENTS_MEDIATED_BY_MAP_KINASES                                                                | REACTOME | 30 |
| TRAF6_MEDIATED_IRF7_ACTIVATION                                                                                     | REACTOME | 30 |
| NOD1_2_SIGNALING_PATHWAY                                                                                           | REACTOME | 30 |
| DNA_STRAND_ELONGATION                                                                                              | REACTOME | 30 |
| INTRINSIC_PATHWAY_FOR_APOPTOSIS                                                                                    | REACTOME | 30 |
| ACTIVATION_OF_THE_PRE_REPLICATIVE_COMPLEX                                                                          | REACTOME | 31 |
| SPHINGOLIPID_DE_NOVO_BIOSYNTHESIS                                                                                  | REACTOME | 31 |
| SYNTHESIS_OF_PIP3_AT_THE_PLASMA_MEMBRANE                                                                           | REACTOME | 31 |
| HS_GAG_BIOSYNTHESIS                                                                                                | REACTOME | 31 |
| AMINO_ACID_TRANSPORT_ACROSS_THE_PLASMA_MEMBRANE                                                                    | REACTOME | 31 |
| GPVI_MEDIATED_ACTIVATION_CASCADE                                                                                   | REACTOME | 31 |
| SIGNAL_AMPLIFICATION                                                                                               | REACTOME | 31 |
| ACTIVATION_OF_KAINATE_RECEPTORS_UPON_Glutamate_BINDING                                                             | REACTOME | 31 |
| TRANSPORT_OF_VITAMINS_NUCLEOSIDES_AND_RELATED_MOLECULES                                                            | REACTOME | 31 |
| NEGATIVE_REGULATORS_OF_RIG_I_MDA5_SIGNALING                                                                        | REACTOME | 31 |
| INWARDLY_RECTIFYING_K_CHANNELS                                                                                     | REACTOME | 31 |
| DAG_AND_IP3_SIGNALING                                                                                              | REACTOME | 32 |
| ELONGATION_ARREST_AND_RECOVERY                                                                                     | REACTOME | 32 |
| CD28_CO_STIMULATION                                                                                                | REACTOME | 32 |
| SEMA4D_IN_SEMAPHORIN_SIGNALING                                                                                     | REACTOME | 32 |
| FORMATION_OF_FIBRIN_CLOT_CLOTTING_CASCADE                                                                          | REACTOME | 32 |
| THROMBIN_SIGNALING_THROUGH_PROTEINASE_ACTIVATED_RECEPTORS_PARS                                                     | REACTOME | 32 |
| COMPLEMENT_CASCADE                                                                                                 | REACTOME | 32 |
| LATENT_INFECTION_OF_HOMO_SAPIENS_WITH_MYCOBACTERIUM_TUBERCULOSIS                                                   | REACTOME | 33 |
| RNA_POL_III_TRANSCRIPTION                                                                                          | REACTOME | 33 |
| TRANSPORT_OF_MATURE_MRNA_DERIVED_FROM_AN_INTRONLESS_TRANSCRIPT                                                     | REACTOME | 33 |
| GLUCAGON_TYPE_LIGAND_RECEPTORS                                                                                     | REACTOME | 33 |
| POST_NMDA_RECEPTOR_ACTIVATION_EVENTS                                                                               | REACTOME | 33 |
| TRANSPORT_TO_THE_GOLGI_AND_SUBSEQUENT_MODIFICATION                                                                 | REACTOME | 33 |
| PURINE_METABOLISM                                                                                                  | REACTOME | 33 |
| INTERACTIONS_OF_VPR_WITH_HOST_CELLULAR_PROTEINS                                                                    | REACTOME | 33 |
| NEUROTRANSMITTER_RELEASE_CYCLE                                                                                     | REACTOME | 34 |
| GLUCONEOGENESIS                                                                                                    | REACTOME | 34 |
| ABC_FAMILY_PROTEINS_MEDIATED_TRANSPORT                                                                             | REACTOME | 34 |
| GLUCAGON_SIGNALING_IN_METABOLIC_REGULATION                                                                         | REACTOME | 34 |
| SIGNAL_TRANSDUCTION_BY_L1                                                                                          | REACTOME | 34 |
| ION_TRANSPORT_BY_P_TYPE_ATPASES                                                                                    | REACTOME | 34 |
| FORMATION_OF_THE_HIV1_EARLY_ELONGATION_COMPLEX                                                                     | REACTOME | 34 |
| METABOLISM_OF_STEROID_HORMONES_AND_VITAMINS_A_AND_D                                                                | REACTOME | 35 |
| MRNA_3_END_PROCESSING                                                                                              | REACTOME | 35 |
| GLOBAL_GENOMIC_NER_GG_NER                                                                                          | REACTOME | 35 |
| E2F_MEDIATED_REGULATION_OF_DNA_REPLICATION                                                                         | REACTOME | 35 |
| BMAL1_CLOCK_NPAS2_ACTIVATES_CIRCADIAN_EXPRESSION                                                                   | REACTOME | 36 |
| SIGNALING_TO_ERKS                                                                                                  | REACTOME | 36 |
| FRS2_MEDIATED_CASCADE                                                                                              | REACTOME | 36 |
| IRON_UPTAKE_AND_TRANSPORT                                                                                          | REACTOME | 36 |
| PLATELET_AGGREGATION_PLUG_FORMATION                                                                                | REACTOME | 36 |
| NEGATIVE_REGULATION_OF_FGFR_SIGNALING                                                                              | REACTOME | 37 |
| DOWNSTREAM_TCR_SIGNALING                                                                                           | REACTOME | 37 |
| ACTIVATION_OF_NMDA_RECEPTOR_UPON_Glutamate_BINDING_AND_POSTSYNAPTIC_EVENTS                                         | REACTOME | 37 |
| PI3K_EVENTS_IN_ERBB4_SIGNALING                                                                                     | REACTOME | 38 |
| NUCLEAR_SIGNALING_BY_ERBB4                                                                                         | REACTOME | 38 |
| GLYCOSPHINGOLIPID_METABOLISM                                                                                       | REACTOME | 38 |
| TRIGLYCERIDE_BIOSYNTHESIS                                                                                          | REACTOME | 38 |
| TRANSCRIPTIONAL_ACTIVITY_OF_SMAD2_SMAD3_SMAD4_HETEROTRIMER                                                         | REACTOME | 38 |
| PI3K_AKT_ACTIVATION                                                                                                | REACTOME | 38 |
| GAB1_SIGNALOSOME                                                                                                   | REACTOME | 38 |
| G1_PHASE                                                                                                           | REACTOME | 38 |
| AMINE_LIGAND_BINDING_RECEPTORS                                                                                     | REACTOME | 38 |
| GLUCOSE_TRANSPORT                                                                                                  | REACTOME | 38 |
| GABA_B_RECEPTOR_ACTIVATION                                                                                         | REACTOME | 38 |
| ACTIVATION_OF_ATR_IN_RESPONSE_TO_REPLICATION_STRESS                                                                | REACTOME | 38 |
| NCAM1_INTERACTIONS                                                                                                 | REACTOME | 39 |
| IL1_SIGNALING                                                                                                      | REACTOME | 39 |
| APOPTOTIC_CLEAVAGE_OF_CELLULAR_PROTEINS                                                                            | REACTOME | 40 |
| RNA_POL_II_TRANSCRIPTION_PRE_INITIATION_AND_PROMOTER_OPENING                                                       | REACTOME | 41 |
| NETRIN1_SIGNALING                                                                                                  | REACTOME | 41 |
| IL_2_SIGNALING                                                                                                     | REACTOME | 41 |
| BETA_DEFENSINS                                                                                                     | REACTOME | 42 |
| TRNA_AMINOACYLATION                                                                                                | REACTOME | 42 |
| NRAGE_SIGNALS_DEATH_THROUGH_JNK                                                                                    | REACTOME | 43 |
| PLC_BETA_MEDIATED_EVENTS                                                                                           | REACTOME | 43 |
| REGULATION_OF_INSULIN_SECRETION_BY_GLUcAGON LIKE PEPTIDE1                                                          | REACTOME | 43 |
| IL_3_5_AND_GM-CSF_SIGNALING                                                                                        | REACTOME | 43 |
| VOLTAGE_GATED_POTASSIUM_CHANNELS                                                                                   | REACTOME | 43 |
| PI3K_EVENTS_IN_ERBB2_SIGNALING                                                                                     | REACTOME | 44 |
| PRE_NOTCH_EXPRESSION_AND_PROCESSING                                                                                | REACTOME | 44 |
| SIGNALING_BY_FGFR_MUTANTS                                                                                          | REACTOME | 44 |
| G_ALPHA_Z_SIGNALING_EVENTS                                                                                         | REACTOME | 44 |
| REGULATION_OF_WATER_BALANCE_BY_RENAL_AQUAPORINS                                                                    | REACTOME | 44 |
| CLEAVAGE_OF_GROWING_TRANSCRIPT_IN_THE_TERMINATION_REGION                                                           | REACTOME | 44 |
| TRANSCRIPTION_COUPLED_NER_TC_NER                                                                                   | REACTOME | 45 |
| MRNA_SPLICING_MINOR_PATHWAY                                                                                        | REACTOME | 45 |

|                                                                                                          |          |    |
|----------------------------------------------------------------------------------------------------------|----------|----|
| FORMATION_OF_RNA_POL_II_ELONGATION_COMPLEX_                                                              | REACTOME | 45 |
| G2_M_CHECKPOINTS                                                                                         | REACTOME | 45 |
| NOTCH1_INTRACELLULAR_DOMAIN_REGULATES_TRANSCRIPTION                                                      | REACTOME | 46 |
| ACTIVATION_OF_CHAPERONE_GENES_BY_XBP1S                                                                   | REACTOME | 46 |
| LIPID_DIGESTION_MOBILIZATION_AND_TRANSPORT                                                               | REACTOME | 46 |
| NUCLEOTIDE_BINDING_DOMAIN_LEUCINE_RICH_REPEAT_CONTAINING_RECEPTOR_NLR_SIGNALING_PATHWAYS                 | REACTOME | 46 |
| PYRUVATE_METABOLISM_AND_CITRIC_ACID_TCA_CYCLE                                                            | REACTOME | 48 |
| CROSS_PRESENTATION_OF_SOLUBLE_EXOGENOUS_ANTIGENS_ENDOSOMES                                               | REACTOME | 48 |
| PI_METABOLISM                                                                                            | REACTOME | 48 |
| CDK_MEDIATED_PHOSPHORYLATION_AND_REMOVAL_OF_CDC6                                                         | REACTOME | 48 |
| MUSCLE_CONTRACTION                                                                                       | REACTOME | 48 |
| DEADENYLATION_DEPENDENT_MRNA_DECAY                                                                       | REACTOME | 48 |
| PACKAGING_OF_TELOMERE_ENDS                                                                               | REACTOME | 48 |
| METABOLISM_OF_NON_CODING_RNA                                                                             | REACTOME | 49 |
| CHONDROITIN_SULFATE_DERMATAN_SULFATE_METABOLISM                                                          | REACTOME | 49 |
| REGULATION_OF_ORNITHINE_DECARBOXYLASE_ODC                                                                | REACTOME | 49 |
| NUCLEAR_RECEPTOR_TRANSCRIPTION_PATHWAY                                                                   | REACTOME | 49 |
| AMINO_ACID_AND_OLIGOPEPTIDE_SLC_TRANSPORTERS                                                             | REACTOME | 49 |
| MAP_KINASE_ACTIVATION_IN_TLR_CASCADE                                                                     | REACTOME | 50 |
| METABOLISM_OF_VITAMINS_AND_COFACTORS                                                                     | REACTOME | 51 |
| DEFENSINS                                                                                                | REACTOME | 51 |
| P53_INDEPENDENT_G1_S_DNA_DAMAGE_CHECKPOINT                                                               | REACTOME | 51 |
| CYTOCHROME_P450_ARRANGED_BY_SUBSTRATE_TYPE                                                               | REACTOME | 51 |
| NUCLEOTIDE_EXCISION_REPAIR                                                                               | REACTOME | 51 |
| AUTODEGRADATION_OF_THE_E3_UBIQUITIN_LIGASE_COP1                                                          | REACTOME | 51 |
| AQUAPORIN_MEDIATED_TRANSPORT                                                                             | REACTOME | 51 |
| SCF_BETA_TRCP_MEDIATED_DEGRADATION_OF_EMI1                                                               | REACTOME | 51 |
| HEPARAN_SULFATE_HEPARIN_HS_GAG_METABOLISM                                                                | REACTOME | 52 |
| GABA_RECEPTOR_ACTIVATION                                                                                 | REACTOME | 52 |
| VIF_MEDIATED_DEGRADATION_OF_APOBEC3G                                                                     | REACTOME | 52 |
| PROTEIN_FOLDING                                                                                          | REACTOME | 53 |
| GOLGI_ASSOCIATED_VESICLE_BIOGENESIS                                                                      | REACTOME | 53 |
| CIRCADIAN_CLOCK                                                                                          | REACTOME | 53 |
| DESTABILIZATION_OF_MRNA_BY_AUF1_HNRNP_D0                                                                 | REACTOME | 53 |
| TCR_SIGNALING                                                                                            | REACTOME | 54 |
| TRANSPORT_OF_MATURE_TRANSCRIPT_TO_CYTOPLASM                                                              | REACTOME | 54 |
| PHOSPHOLIPASE_C_MEDIATED_CASCADE                                                                         | REACTOME | 54 |
| APOPTOTIC_EXECUTION_PHASE                                                                                | REACTOME | 54 |
| ION_CHANNEL_TRANSPORT                                                                                    | REACTOME | 55 |
| CELL_CELL_JUNCTION_ORGANIZATION                                                                          | REACTOME | 56 |
| CDT1_ASSOCIATION_WITH_THE_CDC6_ORC_ORIGIN_COMPLEX                                                        | REACTOME | 56 |
| PI_3K_CASCADE                                                                                            | REACTOME | 56 |
| SCFSKP2_MEDIATED_DEGRADATION_OF_P27_P21                                                                  | REACTOME | 56 |
| CHEMOKINE_RECEPTORS_BIND_CHEMOKINES                                                                      | REACTOME | 57 |
| P53_DEPENDENT_G1_DNA_DAMAGE_RESPONSE                                                                     | REACTOME | 57 |
| MITOCHONDRIAL_PROTEIN_IMPORT                                                                             | REACTOME | 58 |
| COLLAGEN_FORMATION                                                                                       | REACTOME | 58 |
| REGULATION_OF_APOPTOSIS                                                                                  | REACTOME | 58 |
| O_LINKED_GLYCOSYLATION_OF_MUCINS                                                                         | REACTOME | 59 |
| LOSS_OF_NLP_FROM_MITOTIC_CENTROSOMES                                                                     | REACTOME | 59 |
| TRANS_GOLGI_NETWORK_VESICLE_BUDDING                                                                      | REACTOME | 60 |
| CELL_DEATH_SIGNALLING_VIA_NRAE_NRF1_AND_NADE                                                             | REACTOME | 60 |
| ER_PHAGOSOME_PATHWAY                                                                                     | REACTOME | 61 |
| RNA_POL_II_PRE_TRANSCRIPTION_EVENTS                                                                      | REACTOME | 61 |
| RNA_POL_I_PROMOTER_OPENING                                                                               | REACTOME | 62 |
| COSTIMULATION_BY_THE_CD28_FAMILY                                                                         | REACTOME | 63 |
| INTERFERON_GAMMA_SIGNALING                                                                               | REACTOME | 63 |
| SIGNALING_BY_TGF_BETA_RECEPTOR_COMPLEX                                                                   | REACTOME | 63 |
| ACTIVATION_OF_NF_KAPPAB_IN_B_CELLS                                                                       | REACTOME | 64 |
| NCAM_SIGNALING_FOR_NEURITE_OUT_GROWTH                                                                    | REACTOME | 64 |
| DEPOSITION_OF_NEW_CENPA_CONTAINING_NUCLEOSOMES_AT_THE_CENTROMERE                                         | REACTOME | 64 |
| INTERFERON_ALPHA_BETA_SIGNALING                                                                          | REACTOME | 64 |
| AUTODEGRADATION_OF_CDH1_BY_CDH1_APC_C                                                                    | REACTOME | 64 |
| SIGNALING_BY_WNT                                                                                         | REACTOME | 65 |
| CYCLIN_E_ASSOCIATED_EVENTS_DURING_G1_S_TRANSITION_                                                       | REACTOME | 65 |
| ASSEMBLY_OF_THE_PRE_REPLICATIVE_COMPLEX                                                                  | REACTOME | 65 |
| ANTIVIRAL_MECHANISM_BY_IFN1_STIMULATED_GENES                                                             | REACTOME | 66 |
| RECRUITMENT_OF_MITOTIC_CENTROSOME_PROTEINS_AND_COMPLEXES                                                 | REACTOME | 66 |
| ORC1_REMOVAL_FROM_CHROMATIN                                                                              | REACTOME | 67 |
| SEMAPHORIN_INTERACTIONS                                                                                  | REACTOME | 68 |
| SPHINGOLIPID_METABOLISM                                                                                  | REACTOME | 69 |
| GLUCOSE_METABOLISM                                                                                       | REACTOME | 69 |
| IMMUNOREGULATORY_INTERACTIONS_BETWEEN_A_LYMPHOID_AND_A_NON_LYMPHOID_CELL                                 | REACTOME | 70 |
| SIGNALING_BY_NOTCH1                                                                                      | REACTOME | 70 |
| PHASE1_FUNCTIONALIZATION_OF_COMPOUNDS                                                                    | REACTOME | 70 |
| PHASE_II_CONJUGATION                                                                                     | REACTOME | 70 |
| PI3K_CASCADE                                                                                             | REACTOME | 71 |
| METABOLISM_OF_NUCLEOTIDES                                                                                | REACTOME | 72 |
| NFKB_AND_MAP_KINASES_ACTIVATION_MEDIATED_BY_TLR4_SIGNALING_REPERTOIRE                                    | REACTOME | 72 |
| TRANSCRIPTIONAL_REGULATION_OF_WHITE_ADIPOCYTE_DIFFERENTIATION                                            | REACTOME | 72 |
| APC_C_CDH1_MEDIATED_DEGRADATION_OF_CDC20_AND_OTHER_APC_C_CDH1_TARGETED_PROTEINS_IN_LATE_MITOSIS_EARLY_G1 | REACTOME | 72 |
| RIG_I_MDA5_MEDIATED_INDUCION_OF_IFN_ALPHA_BETA_PATHWAYS                                                  | REACTOME | 73 |
| APC_C_CDC20_MEDIATED_DEGRADATION_OF_MITOTIC_PROTEINS                                                     | REACTOME | 73 |
| MEIOTIC_SYNAPSIS                                                                                         | REACTOME | 73 |
| FORMATION_OF_THE_TERNARY_COMPLEX_AND_SUBSEQUENTLY_THE_43S_COMPLEX                                        | REACTOME | 74 |
| TRIF_MEDIATED_TLR3_SIGNALING                                                                             | REACTOME | 74 |
| G_ALPHA1213_SIGNALING_EVENTS                                                                             | REACTOME | 74 |
| TELOMERE_MAINTENANCE                                                                                     | REACTOME | 75 |
| ANTIGEN_PROCESSING_CROSS_PRESENTATION                                                                    | REACTOME | 76 |
| TRAF6_MEDIATED_INDUCION_OF_NFKB_AND_MAP_KINASES_UPON_TLR7_8_OR_9_ACTIVATION                              | REACTOME | 77 |
| SIGNALING_BY_SCF_KIT                                                                                     | REACTOME | 78 |
| OPIOID_SIGNALLING                                                                                        | REACTOME | 78 |
| CELL_JUNCTION_ORGANIZATION                                                                               | REACTOME | 78 |
| PLATELET_HOMEOSTASIS                                                                                     | REACTOME | 78 |
| INTEGRIN_CELL_SURFACE_INTERACTIONS                                                                       | REACTOME | 79 |
| RESPIRATORY_ELECTRON_TRANSPORT                                                                           | REACTOME | 79 |
| UNFOLDED_PROTEIN_RESPONSE                                                                                | REACTOME | 80 |
| P75_NTR_RECEPTOR_MEDIATED_SIGNALLING                                                                     | REACTOME | 81 |
| M_G1_TRANSITION                                                                                          | REACTOME | 81 |
| MITOTIC_G2_G2_M_PHASES                                                                                   | REACTOME | 81 |
| ASPARAGINE_N_LINKED_GLYCOSYLATION                                                                        | REACTOME | 81 |

|                                                                                                                  |          |     |
|------------------------------------------------------------------------------------------------------------------|----------|-----|
| GLYCEROPHOSPHOLIPID_BIOSYNTHESIS                                                                                 | REACTOME | 82  |
| MYD88_MAL_CASCADE_INITIATED_ON_PLASMA_MEMBRANE                                                                   | REACTOME | 83  |
| AMYLOIDS                                                                                                         | REACTOME | 83  |
| ACTIVATION_OF_THE_MRNA_UPON_BINDING_OF_THE_CAP_BINDING_COMPLEX_AND_EIFS_AND_SUBSEQUENT_BINDING_TO_43S            | REACTOME | 84  |
| REGULATION_OF_MRNA_STABILITY_BY_PROTEINS_THAT_BIND_AU_RICH_ELEMENTS                                              | REACTOME | 84  |
| REGULATION_OF_MITOTIC_CELL_CYCLE                                                                                 | REACTOME | 85  |
| L1CAM_INTERACTIONS                                                                                               | REACTOME | 86  |
| MEIOTIC_RECOMBINATION                                                                                            | REACTOME | 86  |
| EXTRACELLULAR_MATRIX_ORGANIZATION                                                                                | REACTOME | 87  |
| INSULIN_RECEPTOR_SIGNALLING_CASCADE                                                                              | REACTOME | 87  |
| MITOTIC_PROMETAPHASE                                                                                             | REACTOME | 87  |
| CLASS_B_2_SECRETIN_FAMILY_RECEPTORS                                                                              | REACTOME | 88  |
| RESPONSE_TO_ELEVATED_PLATELET_CYTOSOLIC_CA2                                                                      | REACTOME | 89  |
| RNA_POL_I_TRANSCRIPTION                                                                                          | REACTOME | 89  |
| TRANSPORT_OF_GLUCOSE_AND_OTHER_SUGARS_BILE_SALTS_AND_ORGANIC_ACIDS_METAL_IONS_AND_AMINE_COMPOUNDS                | REACTOME | 89  |
| SIGNALING_BY_ERBB4                                                                                               | REACTOME | 90  |
| CELL_SURFACE_INTERACTIONS_AT_THE_VASCULAR_WALL                                                                   | REACTOME | 91  |
| MHC_CLASS_II_ANTIGEN_PRESENTATION                                                                                | REACTOME | 91  |
| SYNTHESIS_OF_DNA                                                                                                 | REACTOME | 92  |
| REGULATION_OF_INSULIN_SECRETION                                                                                  | REACTOME | 93  |
| ACTIVATED_TLR4_SIGNALLING                                                                                        | REACTOME | 93  |
| TRANSPORT_OF_INORGANIC_CATIONS_ANIONS_AND_AMINO_ACIDS_OLIGOPEPTIDES                                              | REACTOME | 94  |
| DOWNSTREAM_SIGNAL_TRANSDUCTION                                                                                   | REACTOME | 95  |
| DOWNSTREAM_SIGNALING_EVENTS_OF_B_CELL_RECEPTOR_BCR                                                               | REACTOME | 97  |
| RESPIRATORY_ELECTRON_TRANSPORT_ATP_SYNTHESIS_BY_CHEMIOSMOTIC_COUPLING_AND_HEAT_PRODUCTION_BY_UNCOUPLING_PROTEINS | REACTOME | 98  |
| POTASSIUM_CHANNELS                                                                                               | REACTOME | 98  |
| DOWNSTREAM_SIGNALING_OF_ACTIVATED_FGFR                                                                           | REACTOME | 100 |
| SIGNALING_BY_ERBB2                                                                                               | REACTOME | 101 |
| SIGNALING_BY_NOTCH                                                                                               | REACTOME | 103 |
| PPARA_ACTIVATES_GENE_EXPRESSION                                                                                  | REACTOME | 104 |
| LATE_PHASE_OF_HIV_LIFE_CYCLE                                                                                     | REACTOME | 104 |
| RNA_POL_II_TRANSCRIPTION                                                                                         | REACTOME | 105 |
| SIGNALING_BY_ILS                                                                                                 | REACTOME | 107 |
| SIGNALING_BY_INSULIN_RECEPTOR                                                                                    | REACTOME | 108 |
| SIGNALING_BY_EGFR_IN_CANCER                                                                                      | REACTOME | 109 |
| S_PHASE                                                                                                          | REACTOME | 109 |
| GLYCOSAMINOGLYCAN_METABOLISM                                                                                     | REACTOME | 111 |
| MRNA_SPLICING                                                                                                    | REACTOME | 111 |
| G1_S_TRANSITION                                                                                                  | REACTOME | 112 |
| DNA_REPAIR                                                                                                       | REACTOME | 112 |
| SIGNALING_BY_FGFR                                                                                                | REACTOME | 112 |
| SIGNALING_BY_RHO_GTPASES                                                                                         | REACTOME | 113 |
| MEIOSIS                                                                                                          | REACTOME | 116 |
| TOLL_RECEPTOR_CASCADES                                                                                           | REACTOME | 118 |
| CELL_CELL_COMMUNICATION                                                                                          | REACTOME | 120 |
| INTEGRATION_OF_ENERGY_METABOLISM                                                                                 | REACTOME | 120 |
| G_ALPHA_S_SIGNALLING_EVENTS                                                                                      | REACTOME | 121 |
| SIGNALING_BY_PDGF                                                                                                | REACTOME | 122 |
| RNA_POL_I_RNA_POL_III_AND_MITOCHONDRIAL_TRANSCRIPTION                                                            | REACTOME | 122 |
| CHROMOSOME_MAINTENANCE                                                                                           | REACTOME | 122 |
| CELL_CYCLE_CHECKPOINTS                                                                                           | REACTOME | 124 |
| HIV_LIFE_CYCLE                                                                                                   | REACTOME | 125 |
| SIGNALING_BY_THE_B_CELL_RECEPTOR_BCR                                                                             | REACTOME | 126 |
| SIGNALING_BY_FGFR_IN_DISEASE                                                                                     | REACTOME | 127 |
| MEMBRANE_TRAFFICKING                                                                                             | REACTOME | 129 |
| FACTORS_INVOLVED_IN_MEGAKARYOCYTE_DEVELOPMENT_AND_PLATELET_PRODUCTION                                            | REACTOME | 132 |
| HOST_INTERACTIONS_OF_HIV_FACTORS                                                                                 | REACTOME | 132 |
| DIABETES_PATHWAYS                                                                                                | REACTOME | 133 |
| NGF_SIGNALLING_VIA_TRKA_FROM_THE_PLASMA_MEMBRANE                                                                 | REACTOME | 137 |
| NEUROTRANSMITTER_RECEPTOR_BINDING_AND_DOWNSTREAM_TRANSMISSION_IN_THE_POSTSYNAPTIC_CELL                           | REACTOME | 137 |
| MITOTIC_G1_S_PHASES                                                                                              | REACTOME | 137 |
| BIOLOGICAL_OXIDATIONS                                                                                            | REACTOME | 139 |
| PROCESSING_OF_CAPPED_INTRON_CONTAINING_PRE_MRNA                                                                  | REACTOME | 140 |
| TCA_CYCLE_AND_RESPIRATORY_ELECTRON_TRANSPORT                                                                     | REACTOME | 141 |
| APOPTOSIS                                                                                                        | REACTOME | 148 |
| PEPTIDE_CHAIN_ELONGATION                                                                                         | REACTOME | 153 |
| INTERFERON_SIGNALING                                                                                             | REACTOME | 159 |
| MRNA_PROCESSING                                                                                                  | REACTOME | 161 |
| FATTY_ACID_TRIACYLGLYCEROL_AND_KETONE_BODY_METABOLISM                                                            | REACTOME | 168 |
| INFLUENZA_VIRAL_RNA_TRANSCRIPTION_AND_REPLICATION                                                                | REACTOME | 169 |
| MITOTIC_M_M_G1_PHASES                                                                                            | REACTOME | 172 |
| 3_UTR_MEDIATED_TRANSLATIONAL_REGULATION                                                                          | REACTOME | 176 |
| NONSENSE_MEDIATED_DECAY_ENHANCED_BY_THE_EXON_JUNCTION_COMPLEX                                                    | REACTOME | 176 |
| SRP_DEPENDENT_COTRANSLATIONAL_PROTEIN_TARGETING_TO_MEMBRANE                                                      | REACTOME | 179 |
| G_ALPHA_Q_SIGNALLING_EVENTS                                                                                      | REACTOME | 184 |
| TRANSMISSION_ACROSS_CHEMICAL_SYNAPSES                                                                            | REACTOME | 186 |
| PEPTIDE_LIGAND_BINDING_RECEPTORS                                                                                 | REACTOME | 188 |
| POST_TRANSLATIONAL_PROTEIN_MODIFICATION                                                                          | REACTOME | 188 |
| DNA_REPLICATION                                                                                                  | REACTOME | 192 |
| G_ALPHA_I_SIGNALLING_EVENTS                                                                                      | REACTOME | 195 |
| PHOSPHOLIPID_METABOLISM                                                                                          | REACTOME | 198 |
| METABOLISM_OF_AMINO_ACIDS_AND_DERIVATIVES                                                                        | REACTOME | 200 |
| INFLUENZA_LIFE_CYCLE                                                                                             | REACTOME | 203 |
| GASTRIN_CREB_SIGNALLING_PATHWAY_VIA_PKC_AND_MAPK                                                                 | REACTOME | 205 |
| HIV_INFECTION                                                                                                    | REACTOME | 207 |
| PLATELET_ACTIVATION_SIGNALING_AND_AGGREGATION                                                                    | REACTOME | 208 |
| TRANSCRIPTION                                                                                                    | REACTOME | 210 |
| ANTIGEN_PROCESSING_UBIQUITINATION_PROTEASOME_DEGRADATION                                                         | REACTOME | 212 |
| SIGNALING_BY_NGF                                                                                                 | REACTOME | 217 |
| TRANSLATION                                                                                                      | REACTOME | 222 |
| SLC_MEDIATED_TRANSMEMBRANE_TRANSPORT                                                                             | REACTOME | 241 |
| METABOLISM_OF_CARBHYDRATES                                                                                       | REACTOME | 247 |
| AXON_GUIDANCE                                                                                                    | REACTOME | 251 |
| CLASS_I_MHC_MEDIATED_ANTIGEN_PROCESSING_PRESENTATION                                                             | REACTOME | 251 |
| CYTOKINE_SIGNALING_IN_IMMUNE_SYSTEM                                                                              | REACTOME | 270 |
| NEURONAL_SYSTEM                                                                                                  | REACTOME | 279 |
| INNATE_IMMUNE_SYSTEM                                                                                             | REACTOME | 279 |
| METABOLISM_OF_MRNA                                                                                               | REACTOME | 284 |

**Abbreviations:** Genes, number of genes contained in each particular pathway.



### 3. Supplementary Figures

#### 3.1 Figure S1. Principal components of the SLE discovery cohort.

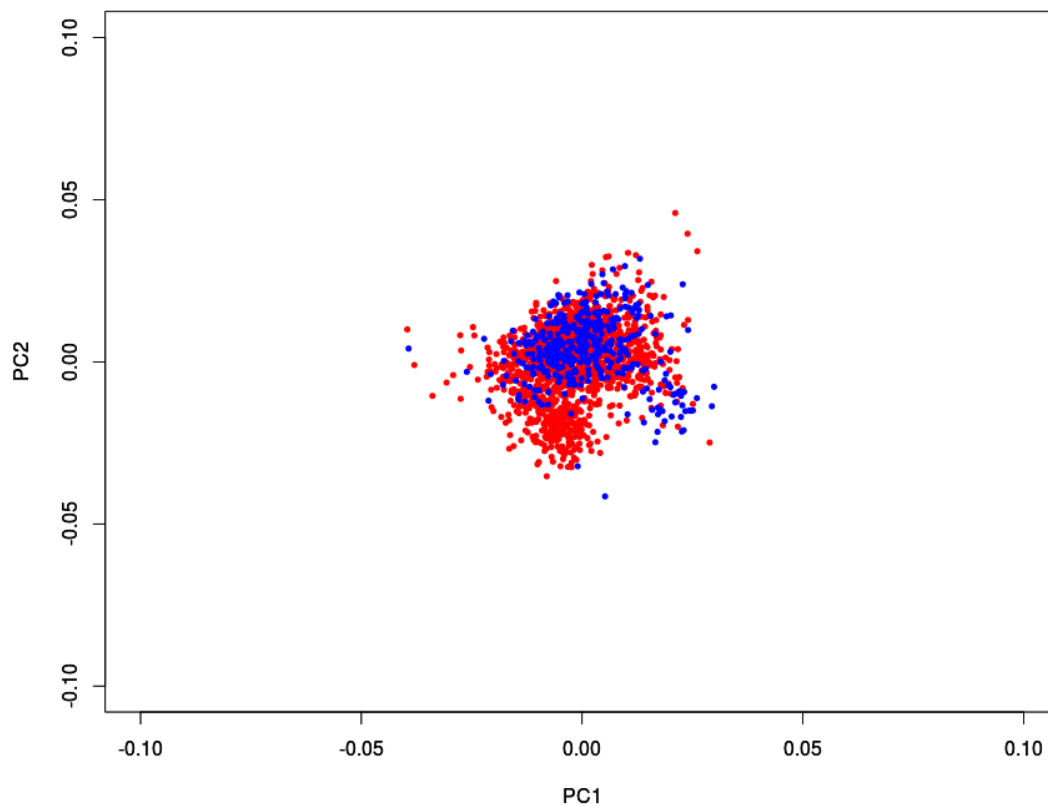

**Figure S1. Principal components of the SLE discovery cohort.** The SLE patients (blue dots) and control patients (red dots) are plotted according to their first (PC1) and second (PC2) principal components estimated in EIGENSTRAT using the genome-wide data. In the present figure, samples showing an outlier genetic background (i.e. samples with  $>6$  standard deviations in any of the 10 principal components of variation) were excluded.

## 4. References

1. Julia A, Tortosa R, Hernanz JM, Canete JD, Fonseca E, Ferrandiz C, Unamuno P, Puig L, Fernandez-Sueiro JL, Sanmarti R *et al*: Risk variants for psoriasis vulgaris in a large case-control collection and association with clinical subphenotypes. *Hum Mol Genet* 2012, 21(20):4549-4557. Epub 2012 Jul 4519.
2. Tan EM, Cohen AS, Fries JF, Masi AT, McShane DJ, Rothfield NF, Schaller JG, Talal N, Winchester RJ: The 1982 revised criteria for the classification of systemic lupus erythematosus. *Arthritis Rheum* 1982, 25(11):1271-1277.
3. Purcell S, Neale B, Todd-Brown K, Thomas L, Ferreira MA, Bender D, Maller J, Sklar P, de Bakker PI, Daly MJ *et al*: PLINK: a tool set for whole-genome association and population-based linkage analyses. *Am J Hum Genet* 2007, 81(3):559-575. Epub 2007 Jul 2025.
4. Aterido A, Julia A, Ferrandiz C, Puig L, Fonseca E, Fernandez-Lopez E, Dauden E, Sanchez-Carazo JL, Lopez-Estebarez JL, Moreno-Ramirez D *et al*: Genome-Wide Pathway Analysis Identifies Genetic Pathways Associated with Psoriasis. *J Invest Dermatol* 2016, 136(3):593-602. doi: 510.1016/j.jid.2015.1011.1026. Epub 2015 Dec 1029.
5. Price AL, Patterson NJ, Plenge RM, Weinblatt ME, Shadick NA, Reich D: Principal components analysis corrects for stratification in genome-wide association studies. *Nat Genet* 2006, 38(8):904-909. Epub 2006 Jul 2023.
6. Delaneau O, Zagury JF, Marchini J: Improved whole-chromosome phasing for disease and population genetic studies. *Nature methods* 2013, 10(1):5-6.
7. Howie B, Marchini J, Stephens M: Genotype imputation with thousands of genomes. *G3 (Bethesda, Md)* 2011, 1(6):457-470.
8. Abecasis GR, Auton A, Brooks LD, DePristo MA, Durbin RM, Handsaker RE, Kang HM, Marth GT, McVean GA: An integrated map of genetic variation from 1,092 human genomes. *Nature* 2012, 491(7422):56-65.
9. Edgar R, Domrachev M, Lash AE: Gene Expression Omnibus: NCBI gene expression and hybridization array data repository. *Nucleic Acids Res* 2002, 30(1):207-210.
10. Chang AY, Werth VP: Treatment of cutaneous lupus. *Curr Rheumatol Rep* 2011, 13(4):300-307. doi: 310.1007/s11926-11011-10180-z.
11. Khandpur S, Sharma VK, Sumanth K: Topical immunomodulators in dermatology. *J Postgrad Med* 2004, 50(2):131-139.
12. Allison DB, Cui X, Page GP, Sabripour M: Microarray data analysis: from disarray to consolidation and consensus. *Nat Rev Genet* 2006, 7(1):55-65.
13. Bolstad BM, Irizarry RA, Astrand M, Speed TP: A comparison of normalization methods for high density oligonucleotide array data based on variance and bias. *Bioinformatics* 2003, 19(2):185-193.
14. Ihaka R, Gentleman G: R: A language for data analysis and graphics. *Journal of Computational and Graphical Statistics* 1996, 5(5):299-314.
